# Supplementary material for: Of absent mothers, strong sisters and peculiar daughters: The constructional network of English NPN constructions
Source: publisher site journal article supplement (doi:10.1515/cog-2020-0013), 2021-01-27
Supplement: Supplementary file 1 [file j_cog-2020-0013_suppl_002.xlsx]

## Sheet: Tabelle1
Year	Genre	Source	Construction	Noun	Preposition
1999	NEWS	NYTimes	century after century	century	after
1999	NEWS	CSMonitor	century after century	century	after
1999	ACAD	Raritan	century after century	century	after
1999	ACAD	HispanicRev	century after century	century	after
1998	FIC	Bk:EternityRoad	century after century	century	after
1998	NEWS	NYTimes	century after century	century	after
1998	NEWS	NYTimes	century after century	century	after
1998	NEWS	WashPost	century after century	century	after
1998	NEWS	WashPost	century after century	century	after
1998	ACAD	EnvironEd	century after century	century	after
1997	SPOK	PBS_Newshour	century after century	century	after
1997	SPOK	NPR_TalkNation	century after century	century	after
1997	SPOK	NPR_TalkNation	century after century	century	after
1997	MAG	Money	century after century	century	after
1997	ACAD	AcademicQs	century after century	century	after
1997	ACAD	Humanist	century after century	century	after
1996	SPOK	NPR_Morning	century after century	century	after
1996	MAG	SportsIll	century after century	century	after
1996	MAG	ConsumResrch	century after century	century	after
1996	MAG	Smithsonian	century after century	century	after
1999	ACAD	October	century by century	century	by
1992	FIC	MassachRev	century through century	century	through
2003	FIC	RussianLife	century upon century	century	upon
1999	MAG	SatEvenPost	christmas after christmas	christmas	after
1991	FIC	Sierra	day after day	day	after
1996	SPOK	NPR_Weekend	day after day	day	after
2005	SPOK	MSNBC_MeetPress	day after day	day	after
2000	SPOK	CNN_King	day after day	day	after
2000	SPOK	CNN_LiveSun	day after day	day	after
1993	SPOK	CBS_SunMorn	day after day	day	after
1995	FIC	Ploughshares	day after day	day	after
2017	NEWS	Detroit Free Press	day after day	day	after
2017	NEWS	Arizona Daily Star	day after day	day	after
2017	NEWS	Chicago Sun-Times	day after day	day	after
2016	FIC	Bk:HollywoodLost	day after day	day	after
2016	ACAD	Film History	day after day	day	after
2016	SPOK	PBS: PBS Newshour	day after day	day	after
2015	SPOK	NBC: Today Show	day after day	day	after
2015	FIC	SouthernRev	day after day	day	after
2015	MAG	NaturalHist	day after day	day	after
2014	MAG	Futurist	day after day	day	after
2013	SPOK	ABC: Nightline	day after day	day	after
2013	SPOK	NPR: Fresh Air	day after day	day	after
2013	FIC	Bk:GracesPictures	day after day	day	after
2013	FIC	IowaRev	day after day	day	after
2013	FIC	LiteraryRev	day after day	day	after
2013	FIC	VirginiaQRev	day after day	day	after
2012	SPOK	CNN PRESENTS	day after day	day	after
2012	FIC	Bk:QueensVowNovel	day after day	day	after
2012	FIC	SouthernRev	day after day	day	after
2012	FIC	Bk:QueensVowNovel	day after day	day	after
2012	ACAD	TechEngineerTeacher	day after day	day	after
2012	ACAD	ArtJournal	day after day	day	after
2012	SPOK	Fox: Live Event	day after day	day	after
2011	SPOK	CNN_Behar	day after day	day	after
2011	FIC	Bk:NextLoveNovel	day after day	day	after
2011	FIC	Bk:SummerInSouthNovel	day after day	day	after
2011	FIC	Analog	day after day	day	after
2011	MAG	MensHealth	day after day	day	after
2011	NEWS	Houston	day after day	day	after
2010	SPOK	NPR_TalkNation	day after day	day	after
2010	SPOK	CNN_Grace	day after day	day	after
2010	ACAD	Commentary	day after day	day	after
2009	FIC	HudsonRev	day after day	day	after
2009	MAG	WashMonth	day after day	day	after
2008	FIC	Bk:EighthShepherd	day after day	day	after
2008	MAG	ChristCentury	day after day	day	after
2007	NEWS	Atlanta	day after day	day	after
2007	ACAD	ContempFic	day after day	day	after
2007	ACAD	ChurchHistory	day after day	day	after
2007	SPOK	Fox_Zahn	day after day	day	after
2007	FIC	Read	day after day	day	after
2006	SPOK	Fox_OReilly	day after day	day	after
2006	SPOK	CBS_FaceNation	day after day	day	after
2006	FIC	Highlights	day after day	day	after
2006	FIC	TexasMonthly	day after day	day	after
2006	FIC	Bk:BlueWater	day after day	day	after
2006	MAG	Bicycling	day after day	day	after
2005	MAG	Ms	day after day	day	after
2005	SPOK	NPR_Daybreak	day after day	day	after
2005	SPOK	NPR_ATCW	day after day	day	after
2005	FIC	HarpersMag	day after day	day	after
2004	SPOK	CBS_SixtyII	day after day	day	after
2004	SPOK	CNN_Reliable	day after day	day	after
2004	MAG	HarpersMag	day after day	day	after
2004	NEWS	Houston	day after day	day	after
2003	SPOK	CNN_Chung	day after day	day	after
2003	SPOK	CNN_LiveSat	day after day	day	after
2003	SPOK	CNN_SunMorn	day after day	day	after
2003	FIC	FantasySciFi	day after day	day	after
2003	MAG	Bicycling	day after day	day	after
2002	MAG	GoodHousekeeping	day after day	day	after
2001	SPOK	ABC_GMA	day after day	day	after
2001	SPOK	CNN_King	day after day	day	after
2001	FIC	Bk:Unshaken	day after day	day	after
2001	MAG	Shape	day after day	day	after
2001	NEWS	NYTimes	day after day	day	after
2000	MAG	TotalHealth	day after day	day	after
2000	MAG	ChildLife	day after day	day	after
2000	NEWS	SanFranChron	day after day	day	after
1999	SPOK	CNN_Talkback	day after day	day	after
1999	FIC	FantasySciFi	day after day	day	after
1999	FIC	World&I	day after day	day	after
1999	MAG	OutdoorLife	day after day	day	after
1998	NEWS	SanFranChron	day after day	day	after
1998	SPOK	NPR_Science	day after day	day	after
1998	FIC	KenyonRev	day after day	day	after
1998	FIC	ParisRev	day after day	day	after
1998	FIC	AIMSJournal	day after day	day	after
1998	FIC	ContempFic	day after day	day	after
1998	MAG	GoodHousekeeping	day after day	day	after
1998	MAG	Esquire	day after day	day	after
1997	SPOK	CBS_48Hours	day after day	day	after
1997	SPOK	NBC_Today	day after day	day	after
1997	FIC	Ploughshares	day after day	day	after
1997	NEWS	Houston	day after day	day	after
1996	SPOK	CBS_FaceNation	day after day	day	after
1996	MAG	GoodHousekeeping	day after day	day	after
1995	NEWS	Atlanta	day after day	day	after
1995	NEWS	Atlanta	day after day	day	after
1995	SPOK	NPR_Morning	day after day	day	after
1995	FIC	Bk:Moo	day after day	day	after
1994	SPOK	CBS_FaceNation	day after day	day	after
1994	FIC	SouthernRev	day after day	day	after
1994	FIC	Bk:NoneAccompany	day after day	day	after
1994	MAG	ChristCentury	day after day	day	after
1994	ACAD	AmerScholar	day after day	day	after
1993	FIC	HarpersMag	day after day	day	after
1993	MAG	HarpersMag	day after day	day	after
1993	NEWS	SanFranChron	day after day	day	after
1993	ACAD	Raritan	day after day	day	after
1993	SPOK	NPR_America	day after day	day	after
1993	SPOK	ABC_Special	day after day	day	after
1993	SPOK	ABC_Brinkley	day after day	day	after
1992	SPOK	ABC_20/20	day after day	day	after
1992	SPOK	ABC_Jennings	day after day	day	after
1992	FIC	LiteraryRev	day after day	day	after
1992	FIC	KansasQ	day after day	day	after
1992	FIC	LiteraryRev	day after day	day	after
1992	FIC	Mov:CityJoy	day after day	day	after
1992	MAG	NatlParks	day after day	day	after
1992	ACAD	AmerScholar	day after day	day	after
1992	SPOK	ABC_Nightline	day after day	day	after
1992	SPOK	NPR_Weekend	day after day	day	after
1991	FIC	Ploughshares	day after day	day	after
1991	MAG	WashMonth	day after day	day	after
1991	MAG	ChildrenToday	day after day	day	after
1991	NEWS	NYTimes	day after day	day	after
1990	SPOK	ABC_20/20	day after day	day	after
1990	SPOK	ABC_20/20	day after day	day	after
1990	SPOK	ABC_20/20	day after day	day	after
1990	FIC	Bk:PublicSecrets	day after day	day	after
1990	FIC	Bk:Dazzle	day after day	day	after
2004	SPOK	CNN_Reliable	day after day	day	after
2011	NEWS	NYTimes	day after day	day	after
2000	SPOK	CNN_YourHealth	day after day	day	after
2017	ACAD	Journal of American Folklore	day after day	day	after
2017	ACAD	Journal of American Folklore	day after day	day	after
2016	ACAD	Twentieth Century Literature	day after day	day	after
2015	SPOK	NBC: Today Show	day after day	day	after
2015	SPOK	CNN: CNN Newsroom	day after day	day	after
2014	FIC	FantasySciFi	day after day	day	after
2012	FIC	Bk:VariationsNovel	day after day	day	after
2012	FIC	Bk:VariationsNovel	day after day	day	after
2012	MAG	NationalGeographic	day after day	day	after
2007	ACAD	LiteraryRev	day after day	day	after
2006	SPOK	Fox_HC	day after day	day	after
2005	NEWS	NYTimes	day after day	day	after
2005	ACAD	AmerScholar	day after day	day	after
2003	NEWS	SanFranChron	day after day	day	after
2001	FIC	AntiochRev	day after day	day	after
2001	FIC	NewEnglandRev	day after day	day	after
2001	FIC	Bk:LastWords	day after day	day	after
2001	NEWS	WashPost	day after day	day	after
1998	MAG	Futurist	day after day	day	after
1998	SPOK	NPR_ATC	day after day	day	after
1997	NEWS	NYTimes	day after day	day	after
1996	FIC	SouthernRev	day after day	day	after
1996	FIC	SouthernRev	day after day	day	after
1995	MAG	NaturalHist	day after day	day	after
1994	SPOK	PBS_Newshour	day after day	day	after
1994	MAG	AmHeritage	day after day	day	after
1993	SPOK	ABC_DayOne	day after day	day	after
1993	FIC	Bk:AreYouMine?	day after day	day	after
1992	SPOK	ABC_Jennings	day after day	day	after
1991	MAG	TIME	day after day	day	after
1991	NEWS	WashPost	day after day	day	after
2016	MAG	Mother Jones	day after day	day	after
2012	SPOK	CNN PRESENTS	day after day	day	after
2009	SPOK	CBS_Early	day after day	day	after
2007	SPOK	CBS_Early	day after day	day	after
1997	SPOK	NPR_Sunday	day after day	day	after
1996	SPOK	PBS_Newshour	day after day	day	after
1990	MAG	AmSpect	day after day	day	after
2005	SPOK	CNN_Reliable	day after day	day	after
2000	SPOK	NPR_ATCW	day after day	day	after
2009	SPOK	ABC_20/20	day after day	day	after
1992	FIC	SouthernRev	day after day	day	after
2017	SPOK	PBS: PBS Newshour	day after day	day	after
2017	SPOK	PBS: PBS Newshour	day after day	day	after
2017	SPOK	NPR: Fresh Air	day after day	day	after
2017	SPOK	Fox: Your World: Cavuto	day after day	day	after
2017	SPOK	CBS: Face The Nation	day after day	day	after
2017	NEWS	The Boston Globe	day after day	day	after
2017	NEWS	The Boston Globe	day after day	day	after
2016	SPOK	CBS: Face The Nation	day after day	day	after
2016	FIC	Social Alternatives	day after day	day	after
2016	SPOK	NPR: Fresh Air	day after day	day	after
2015	SPOK	CBS: 48 Hours	day after day	day	after
2014	FIC	FantasySciFi	day after day	day	after
2014	NEWS	Denver	day after day	day	after
2014	SPOK	CNN: New Day	day after day	day	after
2013	MAG	Astronomy	day after day	day	after
2012	SPOK	CNN Newsroom	day after day	day	after
2012	SPOK	NPR_FreshAir	day after day	day	after
2012	MAG	FieldStream	day after day	day	after
2012	SPOK	ABC: 20/20	day after day	day	after
2011	SPOK	Fox_Journal	day after day	day	after
2011	SPOK	CBS_Early	day after day	day	after
2011	SPOK	CBS_Early	day after day	day	after
2011	SPOK	ABC_Primetime	day after day	day	after
2011	NEWS	Atlanta	day after day	day	after
2010	NEWS	NYTimes	day after day	day	after
2009	SPOK	CNN_Showbiz	day after day	day	after
2009	MAG	GoodHousekeeping	day after day	day	after
2008	SPOK	Fox_HC	day after day	day	after
2008	FIC	Analog	day after day	day	after
2008	NEWS	Denver	day after day	day	after
2006	SPOK	CNN_Zahn	day after day	day	after
2006	SPOK	NPR_TalkNation	day after day	day	after
2006	MAG	Backpacker	day after day	day	after
2005	MAG	MensHealth	day after day	day	after
2005	SPOK	CNN_Intl	day after day	day	after
2005	SPOK	CNN_Situation	day after day	day	after
2005	FIC	BkSF:Wolverine	day after day	day	after
2004	SPOK	CBS_Rather	day after day	day	after
2004	SPOK	CNN_King	day after day	day	after
2004	SPOK	CNN_King	day after day	day	after
2004	SPOK	CNN_OnStory	day after day	day	after
2003	SPOK	NPR_FreshAir	day after day	day	after
2003	SPOK	NPR_Morning	day after day	day	after
2003	FIC	Ploughshares	day after day	day	after
2001	SPOK	NPR_FreshAir	day after day	day	after
2001	SPOK	NPR_ATCW	day after day	day	after
2001	SPOK	CNN_SunMorn	day after day	day	after
2001	MAG	Futurist	day after day	day	after
2000	ACAD	CanadaLaw	day after day	day	after
1999	SPOK	ABC_Special	day after day	day	after
1999	SPOK	CNN_King	day after day	day	after
1999	SPOK	NBC_Dateline	day after day	day	after
1999	SPOK	Fox_Sunday	day after day	day	after
1999	SPOK	NPR_TalkNation	day after day	day	after
1999	MAG	HarpersMag	day after day	day	after
1999	MAG	MensHealth	day after day	day	after
1998	SPOK	CNN_King	day after day	day	after
1998	SPOK	NBC_Dateline	day after day	day	after
1998	SPOK	Fox_Sunday	day after day	day	after
1998	SPOK	CBS_SunMorn	day after day	day	after
1998	SPOK	Ind_Geraldo	day after day	day	after
1998	SPOK	NPR_ATC	day after day	day	after
1998	FIC	Bk:StartingOut	day after day	day	after
1997	SPOK	CBS_FaceNation	day after day	day	after
1997	NEWS	NYTimes	day after day	day	after
1997	SPOK	ABC_Nightline	day after day	day	after
1996	SPOK	CBS_48Hours	day after day	day	after
1996	SPOK	CBS_Sixty	day after day	day	after
1996	SPOK	CNN_Talkback	day after day	day	after
1996	SPOK	ABC_GMA	day after day	day	after
1996	SPOK	Ind_Springer	day after day	day	after
1995	SPOK	CBS_Morning	day after day	day	after
1995	SPOK	NPR_Weekend	day after day	day	after
1994	SPOK	CBS_Morning	day after day	day	after
1994	SPOK	CBS_Morning	day after day	day	after
1993	MAG	Inc.	day after day	day	after
1993	MAG	Inc.	day after day	day	after
1993	SPOK	CBS_Morning	day after day	day	after
1993	SPOK	ABC_Primetime	day after day	day	after
1993	SPOK	CBS_SunMorn	day after day	day	after
1993	SPOK	ABC_Jennings	day after day	day	after
1993	FIC	BkSF:MovingMars	day after day	day	after
1992	SPOK	CBS_FaceNation	day after day	day	after
1992	SPOK	CNN_King	day after day	day	after
1992	SPOK	CNN_King	day after day	day	after
1991	SPOK	ABC_Jennings	day after day	day	after
1991	SPOK	PBS_Newshour	day after day	day	after
1991	SPOK	ABC_Nightline	day after day	day	after
1991	SPOK	ABC_Nightline	day after day	day	after
1991	SPOK	ABC_Nightline	day after day	day	after
1991	SPOK	ABC_Nightline	day after day	day	after
1991	MAG	Newsweek	day after day	day	after
1991	NEWS	Atlanta	day after day	day	after
1990	SPOK	ABC_Nightline	day after day	day	after
1993	FIC	Bk:AreYouMine?	day after day	day	after
2000	MAG	Bicycling	day after day	day	after
1991	FIC	SouthernRev	day after day	day	after
2015	MAG	NewStatesman	day after day	day	after
2013	SPOK	NPR: Fresh Air	day after day	day	after
2004	MAG	FieldStream	day after day	day	after
2002	SPOK	NPR_Sunday	day after day	day	after
2000	NEWS	AssocPress	day after day	day	after
1999	MAG	TownCountry	day after day	day	after
1993	NEWS	USAToday	day after day	day	after
1993	NEWS	WashPost	day after day	day	after
1991	SPOK	ABC_Nightline	day after day	day	after
2016	SPOK	PBS: PBS Newshour	day after day	day	after
2015	NEWS	OrangeCR	day after day	day	after
2012	MAG	MHQTheQuarterly	day after day	day	after
2012	MAG	Esquire	day after day	day	after
2011	SPOK	CNN_JohnKing	day after day	day	after
2011	NEWS	SanFranChron	day after day	day	after
2010	MAG	MilitaryHist	day after day	day	after
2008	MAG	ChristCentury	day after day	day	after
2007	MAG	FieldStream	day after day	day	after
2007	MAG	FieldStream	day after day	day	after
2006	SPOK	CNN_YourWorld	day after day	day	after
2005	MAG	WashMonth	day after day	day	after
2004	MAG	SportingNews	day after day	day	after
2002	FIC	KenyonRev	day after day	day	after
1998	ACAD	LatinAmResRev	day after day	day	after
1994	SPOK	ABC_Primetime	day after day	day	after
1991	MAG	NewRepublic	day after day	day	after
2002	MAG	Bicycling	day after day	day	after
1993	MAG	SatEvenPost	day after day	day	after
1999	SPOK	ABC_20/20	day after day	day	after
1998	MAG	BoysLife	day after day	day	after
2013	FIC	Bk:EarlIsMine	day after day	day	after
2007	MAG	FieldStream	day after day	day	after
2005	SPOK	CBS_48Hours	day after day	day	after
2002	FIC	Analog	day after day	day	after
2002	FIC	Esquire	day after day	day	after
2006	FIC	Bk:CapitalCrimes	day after day	day	after
1999	SPOK	Fox_Drudge	day after day	day	after
2001	SPOK	NPR_Saturday	day after day	day	after
2012	MAG	Astronomy	day after day	day	after
2012	MAG	Astronomy	day after day	day	after
2013	FIC	Bk:RageAgainstDying	day after day	day	after
2017	SPOK	NBC: Today Show	day after day	day	after
2017	SPOK	NPR: Fresh Air	day after day	day	after
2017	SPOK	CBS: 48 Hours	day after day	day	after
2017	SPOK	NBC: Today Show	day after day	day	after
2017	SPOK	NBC: Today Show	day after day	day	after
2017	SPOK	NBC: Today Show	day after day	day	after
2017	SPOK	NBC: Today Show	day after day	day	after
2017	SPOK	NBC: Today Show	day after day	day	after
2017	SPOK	Fox: Media Buzz	day after day	day	after
2017	SPOK	NBC: Today Show	day after day	day	after
2017	SPOK	NBC: Today Show	day after day	day	after
2017	SPOK	NBC: Today Show	day after day	day	after
2017	SPOK	NBC: Today Show	day after day	day	after
2017	SPOK	PBS: PBS Newshour	day after day	day	after
2017	SPOK	CBS: 48 Hours	day after day	day	after
2017	SPOK	ABC: 20/20	day after day	day	after
2017	FIC	Bk:LastMortalBond	day after day	day	after
2017	FIC	Bk:Nemesis	day after day	day	after
2017	FIC	Bk:MostWonderfulTime	day after day	day	after
2017	FIC	Bk:DawnEmberwilde	day after day	day	after
2017	FIC	Bk:HerSweetestRevenge3	day after day	day	after
2017	FIC	The Massachusetts Review	day after day	day	after
2017	FIC	Highlights	day after day	day	after
2017	FIC	The Massachusetts Review	day after day	day	after
2017	FIC	Triquarterly (Online)	day after day	day	after
2017	FIC	Triquarterly (Online)	day after day	day	after
2017	MAG	ESPN	day after day	day	after
2017	MAG	Daily Beast	day after day	day	after
2017	MAG	RollingStone.com	day after day	day	after
2017	MAG	Mashable	day after day	day	after
2017	MAG	Huffington Post	day after day	day	after
2017	NEWS	New York Times	day after day	day	after
2017	NEWS	New York Times	day after day	day	after
2016	SPOK	PBS: PBS Newshour	day after day	day	after
2016	SPOK	PBS: PBS Newshour	day after day	day	after
2016	FIC	Bk:BorrowedMan	day after day	day	after
2016	FIC	Bk:Replacements	day after day	day	after
2016	FIC	Bk:WabanakiBlues	day after day	day	after
2016	FIC	Bk:Entrevoir	day after day	day	after
2016	FIC	Bk:AlwaysOnMyMind	day after day	day	after
2016	FIC	Literary Review	day after day	day	after
2016	FIC	Analog	day after day	day	after
2016	FIC	World Literature Today	day after day	day	after
2016	FIC	Analog	day after day	day	after
2016	FIC	FantasySciFi	day after day	day	after
2016	FIC	FantasySciFi	day after day	day	after
2016	FIC	New England Review	day after day	day	after
2016	FIC	Analog	day after day	day	after
2016	FIC	New England Review	day after day	day	after
2016	MAG	Bleacher Report	day after day	day	after
2016	MAG	Slate Magazine	day after day	day	after
2016	MAG	The Verge	day after day	day	after
2016	NEWS	OCRegister	day after day	day	after
2016	NEWS	Colorado Springs Gazette	day after day	day	after
2016	ACAD	...and Mass Communication Quarterly	day after day	day	after
2016	ACAD	Biography	day after day	day	after
2016	ACAD	... Higher Education (subscription)	day after day	day	after
2016	FIC	Bk:DarknessRolling	day after day	day	after
2016	FIC	Analog	day after day	day	after
2016	SPOK	CNN: Situation Room	day after day	day	after
2016	SPOK	CNN: Situation Room	day after day	day	after
2016	SPOK	PBS: PBS Newshour	day after day	day	after
2016	SPOK	Fox: Fox News Sunday	day after day	day	after
2016	SPOK	CNN: CNN Newsroom	day after day	day	after
2016	SPOK	NBC: Today Show	day after day	day	after
2016	SPOK	NBC: Dateline NBC	day after day	day	after
2016	SPOK	ABC: 20/20	day after day	day	after
2015	SPOK	NBC: Today Show	day after day	day	after
2015	SPOK	CNN: Quest Means Business	day after day	day	after
2015	SPOK	Fox: O'Reilly Factor	day after day	day	after
2015	SPOK	NPR: Fresh Air	day after day	day	after
2015	SPOK	CNN: CNN Newsroom	day after day	day	after
2015	FIC	Bk:InsideSilverBox	day after day	day	after
2015	FIC	Bk:ShamefulMurder	day after day	day	after
2015	FIC	Bk:DarknessRolling	day after day	day	after
2015	FIC	Bk:Lovesick	day after day	day	after
2015	FIC	Bk:SecretIndiscretions	day after day	day	after
2015	FIC	KenyonRev	day after day	day	after
2015	FIC	SouthernRev	day after day	day	after
2015	FIC	FantasySciFi	day after day	day	after
2015	FIC	FantasySciFi	day after day	day	after
2015	FIC	AmLettersComm	day after day	day	after
2015	FIC	Commentary	day after day	day	after
2015	FIC	Commentary	day after day	day	after
2015	FIC	FilmHistory	day after day	day	after
2015	FIC	GettysburgRev	day after day	day	after
2015	FIC	IowaRev	day after day	day	after
2015	FIC	VirginiaQRev	day after day	day	after
2015	FIC	SouthernRev	day after day	day	after
2015	FIC	Raritan	day after day	day	after
2015	FIC	Ploughshares	day after day	day	after
2015	FIC	Ploughshares	day after day	day	after
2015	FIC	LiteraryRev	day after day	day	after
2015	FIC	SouthernRev	day after day	day	after
2015	FIC	SouthernRev	day after day	day	after
2015	FIC	SatEvenPost	day after day	day	after
2015	MAG	ChristToday	day after day	day	after
2015	MAG	Atlantic	day after day	day	after
2015	MAG	Newsweek	day after day	day	after
2015	MAG	Newsweek	day after day	day	after
2015	MAG	PopMech	day after day	day	after
2015	MAG	Prevention	day after day	day	after
2015	MAG	SatEvenPost	day after day	day	after
2015	MAG	ScienceNews	day after day	day	after
2015	MAG	ScienceNews	day after day	day	after
2015	NEWS	WashPost	day after day	day	after
2015	NEWS	OrangeCR	day after day	day	after
2015	NEWS	Pittsburgh	day after day	day	after
2015	ACAD	SchoolPsych	day after day	day	after
2015	ACAD	ArtBulletin	day after day	day	after
2015	ACAD	ArtBulletin	day after day	day	after
2014	FIC	Bk:MercySnowNovel	day after day	day	after
2014	FIC	Bk:AlwaysOnMyMind	day after day	day	after
2014	FIC	Bk:BewareBeware	day after day	day	after
2014	FIC	Bk:Silverblind	day after day	day	after
2014	FIC	VirginiaQRev	day after day	day	after
2014	FIC	LiteraryRev	day after day	day	after
2014	FIC	AntiochRev	day after day	day	after
2014	FIC	AntiochRev	day after day	day	after
2014	FIC	Ploughshares	day after day	day	after
2014	FIC	Raritan	day after day	day	after
2014	FIC	FantasySciFi	day after day	day	after
2014	FIC	Overland	day after day	day	after
2014	FIC	GettysburgRev	day after day	day	after
2014	MAG	America	day after day	day	after
2014	MAG	Esquire	day after day	day	after
2014	MAG	MilitaryHist	day after day	day	after
2014	MAG	NatlReview	day after day	day	after
2014	MAG	NewRepublic	day after day	day	after
2014	MAG	Prevention	day after day	day	after
2014	NEWS	WashPost	day after day	day	after
2014	NEWS	USAToday	day after day	day	after
2014	NEWS	CSMonitor	day after day	day	after
2014	NEWS	OrangeCR	day after day	day	after
2014	ACAD	MusicEduc	day after day	day	after
2014	ACAD	JournalEcumenical	day after day	day	after
2014	ACAD	PoliticsLifeSciences	day after day	day	after
2014	SPOK	Fox: O'Reilly Factor	day after day	day	after
2014	SPOK	NBC: Today Show	day after day	day	after
2014	SPOK	NBC: Today Show	day after day	day	after
2014	FIC	IowaRev	day after day	day	after
2014	FIC	NewEnglandRev	day after day	day	after
2013	SPOK	ABC: 20/20	day after day	day	after
2013	SPOK	ABC: This Week	day after day	day	after
2013	SPOK	ABC: Nightline	day after day	day	after
2013	SPOK	ABC: Nightline	day after day	day	after
2013	SPOK	NBC: Today Show	day after day	day	after
2013	SPOK	NBC: Today Show	day after day	day	after
2013	SPOK	CBS: 48 Hours	day after day	day	after
2013	FIC	Bk:PrayerBox	day after day	day	after
2013	FIC	Bk:FlatWaterTuesday	day after day	day	after
2013	FIC	Bk:AbundanceNovel	day after day	day	after
2013	FIC	KenyonRev	day after day	day	after
2013	FIC	SouthwestRev	day after day	day	after
2013	FIC	ParisRev	day after day	day	after
2013	FIC	ParisRev	day after day	day	after
2013	FIC	Confrontation	day after day	day	after
2013	FIC	SewaneeRev	day after day	day	after
2013	FIC	AmScholar	day after day	day	after
2013	FIC	SouthernRev	day after day	day	after
2013	FIC	MassachRev	day after day	day	after
2013	FIC	AntiochRev	day after day	day	after
2013	FIC	SatEvenPost	day after day	day	after
2013	FIC	QuadrantMagazine	day after day	day	after
2013	FIC	WestHumRev	day after day	day	after
2013	MAG	America	day after day	day	after
2013	MAG	MilitaryHist	day after day	day	after
2013	MAG	NaturalHist	day after day	day	after
2013	MAG	Newsweek	day after day	day	after
2013	MAG	Newsweek	day after day	day	after
2013	MAG	SatEvenPost	day after day	day	after
2013	MAG	NewStatesman	day after day	day	after
2013	NEWS	WashPost	day after day	day	after
2013	NEWS	NYTimes	day after day	day	after
2013	NEWS	CSMonitor	day after day	day	after
2013	NEWS	STLouis	day after day	day	after
2013	NEWS	Pittsburgh	day after day	day	after
2013	ACAD	SocialWork	day after day	day	after
2012	SPOK	CBS_NewsEve	day after day	day	after
2012	SPOK	NBC_Today	day after day	day	after
2012	SPOK	NBC_Today	day after day	day	after
2012	SPOK	NBC_Today	day after day	day	after
2012	SPOK	Fox_Kilmeade	day after day	day	after
2012	FIC	Bk:DarkestHighlander	day after day	day	after
2012	FIC	IowaRev	day after day	day	after
2012	FIC	Analog	day after day	day	after
2012	FIC	Writer	day after day	day	after
2012	FIC	Bk:WhatWeTalkAbout	day after day	day	after
2012	FIC	Bk:TooBrightHearToo	day after day	day	after
2012	FIC	Bk:TexansChoice	day after day	day	after
2012	MAG	Esquire	day after day	day	after
2012	MAG	Smithsonian	day after day	day	after
2012	MAG	Esquire	day after day	day	after
2012	MAG	People	day after day	day	after
2012	MAG	PopMech	day after day	day	after
2012	NEWS	NYTimes	day after day	day	after
2012	NEWS	WashPost	day after day	day	after
2012	NEWS	Denver	day after day	day	after
2012	NEWS	Pittsburgh	day after day	day	after
2012	ACAD	Futurist	day after day	day	after
2012	ACAD	PhysicalEduc	day after day	day	after
2012	SPOK	CBS: Face The Nation	day after day	day	after
2012	SPOK	Fox: The Five	day after day	day	after
2012	SPOK	NPR: Talk Of The Nation	day after day	day	after
2011	SPOK	ABC_ThisWeek	day after day	day	after
2011	SPOK	NPR_Science	day after day	day	after
2011	SPOK	ABC_Primetime	day after day	day	after
2011	SPOK	Fox_OReilly	day after day	day	after
2011	SPOK	Fox_OReilly	day after day	day	after
2011	SPOK	ABC_ThisWeek	day after day	day	after
2011	SPOK	PBS_NewsHour	day after day	day	after
2011	SPOK	NBC_Matthews	day after day	day	after
2011	SPOK	ABC_20/20	day after day	day	after
2011	SPOK	CNN PRESENTS	day after day	day	after
2011	FIC	Storyworks	day after day	day	after
2011	FIC	Bk:HistoryHistory	day after day	day	after
2011	FIC	Bk:IllNeverGetOut	day after day	day	after
2011	FIC	Bk:Colorado!	day after day	day	after
2011	FIC	Bk:ZoneOneNovel	day after day	day	after
2011	FIC	Bk:ZoneOneNovel	day after day	day	after
2011	FIC	Bk:BeingPoliteHitler	day after day	day	after
2011	FIC	Bk:BeingPoliteHitler	day after day	day	after
2011	FIC	Bk:BackBeyond	day after day	day	after
2011	FIC	Bk:MuleNovelMoving	day after day	day	after
2011	FIC	IowaRev	day after day	day	after
2011	FIC	IowaRev	day after day	day	after
2011	FIC	Lilith	day after day	day	after
2011	FIC	KenyonRev	day after day	day	after
2011	FIC	NewEnglandRev	day after day	day	after
2011	FIC	IndiaCurrents	day after day	day	after
2011	MAG	Cosmopolitan	day after day	day	after
2011	MAG	Bicycling	day after day	day	after
2011	MAG	MHQTheQuarterly	day after day	day	after
2011	MAG	NationalGeographic	day after day	day	after
2011	NEWS	NYTimes	day after day	day	after
2011	NEWS	SanFranChron	day after day	day	after
2011	ACAD	ScholScope	day after day	day	after
2011	ACAD	ScholScope	day after day	day	after
2011	ACAD	ScholScope	day after day	day	after
2010	SPOK	ABC_ThisWeek	day after day	day	after
2010	SPOK	CBS_Early	day after day	day	after
2010	SPOK	CBS_Early	day after day	day	after
2010	SPOK	Fox_Hannity	day after day	day	after
2010	SPOK	CBS_Early	day after day	day	after
2010	SPOK	CBS_Early	day after day	day	after
2010	SPOK	CBS_Sixty	day after day	day	after
2010	SPOK	NPR_FreshAir	day after day	day	after
2010	FIC	Read	day after day	day	after
2010	FIC	LiteraryRev	day after day	day	after
2010	FIC	Bk:WatchHouse	day after day	day	after
2010	FIC	Bk:ConquerorsShadow	day after day	day	after
2010	FIC	Bk:EverythingLovely	day after day	day	after
2010	FIC	Faces	day after day	day	after
2010	FIC	FantasySciFi	day after day	day	after
2010	FIC	Bk:CompanyHeavenStories	day after day	day	after
2010	FIC	Bk:LotusEaters	day after day	day	after
2010	FIC	Bk:EmpressEternity	day after day	day	after
2010	FIC	Bk:HiddenAffair	day after day	day	after
2010	MAG	Newsweek	day after day	day	after
2010	MAG	America	day after day	day	after
2010	MAG	RollingStone	day after day	day	after
2010	MAG	FieldStream	day after day	day	after
2010	NEWS	Houston	day after day	day	after
2010	NEWS	Denver	day after day	day	after
2010	ACAD	AmerScholar	day after day	day	after
2010	ACAD	Writer	day after day	day	after
2010	ACAD	OccupationalHealth	day after day	day	after
2009	ACAD	Commentary	day after day	day	after
2009	ACAD	ABAJournal	day after day	day	after
2009	ACAD	AnthropolQ	day after day	day	after
2009	SPOK	CBS_Sixty	day after day	day	after
2009	SPOK	CBS_Early	day after day	day	after
2009	SPOK	PBS_NewsHour	day after day	day	after
2009	FIC	Bk:ReliableWife	day after day	day	after
2009	FIC	Bk:BookUnknownTales	day after day	day	after
2009	FIC	Bk:MonstersNotes	day after day	day	after
2009	FIC	Bk:StealingHome	day after day	day	after
2009	FIC	Bk:Mudbound	day after day	day	after
2009	FIC	Bk:Confession	day after day	day	after
2009	FIC	AntiochRev	day after day	day	after
2009	FIC	Commentary	day after day	day	after
2009	FIC	FantasySciFi	day after day	day	after
2009	FIC	AntiochRev	day after day	day	after
2009	FIC	FantasySciFi	day after day	day	after
2009	MAG	ChristCentury	day after day	day	after
2009	MAG	USAToday	day after day	day	after
2009	MAG	FieldStream	day after day	day	after
2009	MAG	OutdoorLife	day after day	day	after
2009	MAG	America	day after day	day	after
2009	MAG	FieldStream	day after day	day	after
2009	MAG	FieldStream	day after day	day	after
2009	NEWS	Houston	day after day	day	after
2009	NEWS	WashPost	day after day	day	after
2009	NEWS	CSMonitor	day after day	day	after
2009	NEWS	USAToday	day after day	day	after
2009	NEWS	Houston	day after day	day	after
2009	NEWS	Denver	day after day	day	after
2009	ACAD	Archaeology	day after day	day	after
2008	SPOK	CBS_FaceNation	day after day	day	after
2008	SPOK	NPR_TellMore	day after day	day	after
2008	SPOK	NBC_Dateline	day after day	day	after
2008	SPOK	NBC_Dateline	day after day	day	after
2008	SPOK	CBS_48Hours	day after day	day	after
2008	SPOK	ABC_Primetime	day after day	day	after
2008	SPOK	CNN Newsroom	day after day	day	after
2008	SPOK	CNN Newsroom	day after day	day	after
2008	FIC	Writer	day after day	day	after
2008	FIC	Bk:GinsengHunter	day after day	day	after
2008	FIC	Bk:LairdMist	day after day	day	after
2008	FIC	Bk:SearchingSpice	day after day	day	after
2008	FIC	Bk:AllSouls	day after day	day	after
2008	FIC	Bk:HouseHome	day after day	day	after
2008	FIC	Bk:Lassassin	day after day	day	after
2008	FIC	Bk:DriftingSouth	day after day	day	after
2008	FIC	FantasySciFi	day after day	day	after
2008	FIC	FeministStud	day after day	day	after
2008	MAG	SatEvenPost	day after day	day	after
2008	MAG	ScienceNews	day after day	day	after
2008	MAG	GoodHousekeeping	day after day	day	after
2008	MAG	Smithsonian	day after day	day	after
2008	NEWS	Chicago	day after day	day	after
2008	NEWS	AssocPress	day after day	day	after
2008	NEWS	USAToday	day after day	day	after
2008	NEWS	USAToday	day after day	day	after
2008	NEWS	Houston	day after day	day	after
2008	NEWS	Chicago	day after day	day	after
2008	NEWS	USAToday	day after day	day	after
2008	NEWS	Denver	day after day	day	after
2008	ACAD	AnthropolQ	day after day	day	after
2008	ACAD	StudiesNovel	day after day	day	after
2008	ACAD	GeographRev	day after day	day	after
2007	MAG	USCatholic	day after day	day	after
2007	MAG	AmSpect	day after day	day	after
2007	NEWS	Chicago	day after day	day	after
2007	NEWS	WashPost	day after day	day	after
2007	NEWS	WashPost	day after day	day	after
2007	NEWS	NYTimes	day after day	day	after
2007	NEWS	SanFranChron	day after day	day	after
2007	ACAD	MusicEduc	day after day	day	after
2007	ACAD	GeorgiaHisQ	day after day	day	after
2007	ACAD	SouthwestRev	day after day	day	after
2007	ACAD	SouthwestRev	day after day	day	after
2007	SPOK	CBS_Early	day after day	day	after
2007	SPOK	Fox_Hume	day after day	day	after
2007	SPOK	NBC_MeetPress	day after day	day	after
2007	SPOK	CBS_SunMorn	day after day	day	after
2007	SPOK	NBC_Dateline	day after day	day	after
2007	FIC	NewEnglandRev	day after day	day	after
2007	FIC	ChildLife	day after day	day	after
2007	FIC	Highlights	day after day	day	after
2007	FIC	Read	day after day	day	after
2007	FIC	CanadWomStud	day after day	day	after
2007	FIC	Salmagundi	day after day	day	after
2007	FIC	CeramicsMonthly	day after day	day	after
2007	FIC	Bk:KissInWinter	day after day	day	after
2007	FIC	Mov:Next	day after day	day	after
2007	MAG	Backpacker	day after day	day	after
2007	MAG	FieldStream	day after day	day	after
2007	MAG	Smithsonian	day after day	day	after
2007	MAG	SatEvenPost	day after day	day	after
2007	MAG	AmSpect	day after day	day	after
2007	MAG	Backpacker	day after day	day	after
2007	MAG	Redbook	day after day	day	after
2006	SPOK	CNN_Gupta	day after day	day	after
2006	SPOK	CNN_Cooper	day after day	day	after
2006	SPOK	CNN_Reliable	day after day	day	after
2006	SPOK	CNN_Event	day after day	day	after
2006	SPOK	CNN_AM	day after day	day	after
2006	SPOK	CNN_Presents	day after day	day	after
2006	SPOK	NPR_Morning	day after day	day	after
2006	SPOK	NPR_Sunday	day after day	day	after
2006	SPOK	NPR_Sunday	day after day	day	after
2006	SPOK	NPR_Sunday	day after day	day	after
2006	SPOK	NPR_Daybreak	day after day	day	after
2006	SPOK	MSNBC_Carlson	day after day	day	after
2006	SPOK	MSNBC_Cosby	day after day	day	after
2006	SPOK	MSNBC_Matt	day after day	day	after
2006	FIC	FantasySciFi	day after day	day	after
2006	FIC	FantasySciFi	day after day	day	after
2006	FIC	FantasySciFi	day after day	day	after
2006	FIC	LiteraryRev	day after day	day	after
2006	FIC	NewEnglandRev	day after day	day	after
2006	FIC	MassachRev	day after day	day	after
2006	FIC	Callaloo	day after day	day	after
2006	FIC	LiteraryRev	day after day	day	after
2006	FIC	NewEnglandRev	day after day	day	after
2006	FIC	NewEnglandRev	day after day	day	after
2006	FIC	NewEnglandRev	day after day	day	after
2006	FIC	VirginiaQRev	day after day	day	after
2006	FIC	NewYorker	day after day	day	after
2006	FIC	LiteraryRev	day after day	day	after
2006	FIC	Bk:Stepmother	day after day	day	after
2006	MAG	Ms	day after day	day	after
2006	MAG	MotherEarth	day after day	day	after
2006	MAG	Redbook	day after day	day	after
2006	MAG	Redbook	day after day	day	after
2006	MAG	Entertainment	day after day	day	after
2006	NEWS	USAToday	day after day	day	after
2006	NEWS	Atlanta	day after day	day	after
2006	ACAD	GeographRev	day after day	day	after
2006	ACAD	ABAJournal	day after day	day	after
2006	ACAD	SocialWork	day after day	day	after
2005	MAG	TownCountry	day after day	day	after
2005	MAG	Essence	day after day	day	after
2005	NEWS	NYTimes	day after day	day	after
2005	NEWS	AssocPress	day after day	day	after
2005	NEWS	USAToday	day after day	day	after
2005	NEWS	WashPost	day after day	day	after
2005	NEWS	Houston	day after day	day	after
2005	ACAD	AmerScholar	day after day	day	after
2005	ACAD	TeachLibrar	day after day	day	after
2005	SPOK	Fox_Saturday	day after day	day	after
2005	SPOK	CBS_Rather	day after day	day	after
2005	SPOK	CNN_YourWorld	day after day	day	after
2005	SPOK	MSNBC_Matt	day after day	day	after
2005	SPOK	CNN_Brown	day after day	day	after
2005	SPOK	CNN_Reliable	day after day	day	after
2005	FIC	HarpersMag	day after day	day	after
2005	FIC	Analog	day after day	day	after
2005	FIC	LiteraryRev	day after day	day	after
2005	FIC	VirginiaQRev	day after day	day	after
2005	FIC	IowaRev	day after day	day	after
2005	FIC	SouthwestRev	day after day	day	after
2005	FIC	NewYorker	day after day	day	after
2005	FIC	Bk:InterpreterMaladies	day after day	day	after
2005	FIC	Bk:LightFrom	day after day	day	after
2005	FIC	Bk:MemorialDay	day after day	day	after
2005	FIC	Bk:OtherwiseEngaged	day after day	day	after
2005	FIC	BkSF:Wolverine	day after day	day	after
2005	FIC	Bk:LongStayDistant	day after day	day	after
2005	FIC	Mov:Jacket	day after day	day	after
2005	MAG	USCatholic	day after day	day	after
2005	MAG	Esquire	day after day	day	after
2005	MAG	RollingStone	day after day	day	after
2005	MAG	Smithsonian	day after day	day	after
2004	SPOK	Fox_Hume	day after day	day	after
2004	SPOK	CBS_Sixty	day after day	day	after
2004	SPOK	CBS_Morning	day after day	day	after
2004	SPOK	NBC_Dateline	day after day	day	after
2004	SPOK	NBC_Dateline	day after day	day	after
2004	SPOK	ABC_GMA	day after day	day	after
2004	SPOK	NPR_Morning	day after day	day	after
2004	SPOK	NPR_Saturday	day after day	day	after
2004	SPOK	NPR_Saturday	day after day	day	after
2004	SPOK	NPR_Saturday	day after day	day	after
2004	SPOK	NPR_Saturday	day after day	day	after
2004	SPOK	NPR_Daybreak	day after day	day	after
2004	SPOK	CNN_Cooper	day after day	day	after
2004	SPOK	CNN_Crossfire	day after day	day	after
2004	SPOK	CNN_King	day after day	day	after
2004	SPOK	CNN_LiveFrom	day after day	day	after
2004	SPOK	CNN_LiveToday	day after day	day	after
2004	SPOK	CNN_Reliable	day after day	day	after
2004	FIC	Commentary	day after day	day	after
2004	FIC	Analog	day after day	day	after
2004	FIC	NewMoon	day after day	day	after
2004	FIC	Salmagundi	day after day	day	after
2004	FIC	VirginiaQRev	day after day	day	after
2004	FIC	VirginiaQRev	day after day	day	after
2004	FIC	World&I	day after day	day	after
2004	FIC	NewYorker	day after day	day	after
2004	FIC	Bk:EssenceMidnight	day after day	day	after
2004	FIC	Bk:BoyBus	day after day	day	after
2004	FIC	Mov:BladeTrinity	day after day	day	after
2004	MAG	BoysLife	day after day	day	after
2004	MAG	Backpacker	day after day	day	after
2004	MAG	Bicycling	day after day	day	after
2004	MAG	NatGeog	day after day	day	after
2004	MAG	Parenting	day after day	day	after
2004	MAG	HarpersMag	day after day	day	after
2004	MAG	MotherJones	day after day	day	after
2004	MAG	Prevention	day after day	day	after
2004	MAG	TIME	day after day	day	after
2004	NEWS	NYTimes	day after day	day	after
2004	NEWS	NYTimes	day after day	day	after
2004	NEWS	CSMonitor	day after day	day	after
2004	NEWS	AssocPress	day after day	day	after
2004	NEWS	Chicago	day after day	day	after
2004	ACAD	Humanist	day after day	day	after
2003	SPOK	CBS_48Hours	day after day	day	after
2003	SPOK	CBS_48Hours	day after day	day	after
2003	SPOK	CNN_Crossfire	day after day	day	after
2003	SPOK	CNN_Global	day after day	day	after
2003	FIC	FantasySciFi	day after day	day	after
2003	FIC	Ploughshares	day after day	day	after
2003	FIC	FantasySciFi	day after day	day	after
2003	FIC	ManagComm	day after day	day	after
2003	FIC	ManagComm	day after day	day	after
2003	FIC	MichiganQRev	day after day	day	after
2003	FIC	VirginiaQRev	day after day	day	after
2003	FIC	Commentary	day after day	day	after
2003	FIC	Commentary	day after day	day	after
2003	FIC	Bk:GentlemenSpace	day after day	day	after
2003	MAG	FieldStream	day after day	day	after
2003	MAG	Ms	day after day	day	after
2003	MAG	BoysLife	day after day	day	after
2003	MAG	BoysLife	day after day	day	after
2003	MAG	SouthernLiv	day after day	day	after
2003	MAG	Backpacker	day after day	day	after
2003	MAG	Bicycling	day after day	day	after
2003	MAG	NatGeog	day after day	day	after
2003	MAG	MensHealth	day after day	day	after
2003	MAG	MotherJones	day after day	day	after
2003	MAG	Prevention	day after day	day	after
2003	MAG	WashMonth	day after day	day	after
2003	MAG	Esquire	day after day	day	after
2003	NEWS	NYTimes	day after day	day	after
2003	NEWS	NYTimes	day after day	day	after
2003	NEWS	NYTimes	day after day	day	after
2003	NEWS	NYTimes	day after day	day	after
2003	NEWS	WashPost	day after day	day	after
2003	NEWS	Atlanta	day after day	day	after
2003	NEWS	SanFranChron	day after day	day	after
2003	NEWS	Denver	day after day	day	after
2003	ACAD	AnthropolQ	day after day	day	after
2003	ACAD	NaturalHist	day after day	day	after
2003	ACAD	NaturalHist	day after day	day	after
2003	ACAD	EnvironHealth	day after day	day	after
2003	ACAD	Archaeology	day after day	day	after
2002	SPOK	Fox_HC	day after day	day	after
2002	SPOK	CBS_FaceNation	day after day	day	after
2002	SPOK	ABC_GMA	day after day	day	after
2002	SPOK	NPR_ATCW	day after day	day	after
2002	SPOK	NPR_ATCW	day after day	day	after
2002	SPOK	CNN_LiveSat	day after day	day	after
2002	SPOK	CNN_LiveToday	day after day	day	after
2002	SPOK	CNN_SunMorn	day after day	day	after
2002	SPOK	CNN_SatMorn	day after day	day	after
2002	FIC	Ploughshares	day after day	day	after
2002	FIC	Highlights	day after day	day	after
2002	FIC	HudsonRev	day after day	day	after
2002	FIC	Listen	day after day	day	after
2002	FIC	FantasySciFi	day after day	day	after
2002	FIC	HarpersMag	day after day	day	after
2002	FIC	HarpersMag	day after day	day	after
2002	FIC	ScholScope	day after day	day	after
2002	FIC	NewEnglandRev	day after day	day	after
2002	FIC	SouthwestRev	day after day	day	after
2002	FIC	SouthernRev	day after day	day	after
2002	FIC	Esquire	day after day	day	after
2002	FIC	Esquire	day after day	day	after
2002	FIC	Mov:Insomnia	day after day	day	after
2002	MAG	Money	day after day	day	after
2002	MAG	Bazaar	day after day	day	after
2002	MAG	Fortune	day after day	day	after
2002	MAG	America	day after day	day	after
2002	MAG	ChristCentury	day after day	day	after
2002	MAG	ChristCentury	day after day	day	after
2002	NEWS	NYTimes	day after day	day	after
2002	NEWS	NYTimes	day after day	day	after
2002	NEWS	AssocPress	day after day	day	after
2002	NEWS	USAToday	day after day	day	after
2002	ACAD	AmerScholar	day after day	day	after
2002	ACAD	AnthropolQ	day after day	day	after
2002	ACAD	RoeperReview	day after day	day	after
2001	ACAD	Humanist	day after day	day	after
2001	SPOK	NPR_FreshAir	day after day	day	after
2001	SPOK	Ind_Oprah	day after day	day	after
2001	SPOK	CNN_Reliable	day after day	day	after
2001	SPOK	CNN_Reliable	day after day	day	after
2001	FIC	FantasySciFi	day after day	day	after
2001	FIC	Analog	day after day	day	after
2001	FIC	Highlights	day after day	day	after
2001	FIC	Bk:Wish	day after day	day	after
2001	FIC	Bk:StandingScratch	day after day	day	after
2001	FIC	Bk:TenWomenWho	day after day	day	after
2001	FIC	Bk:Vineyard	day after day	day	after
2001	FIC	Bk:LegendsLake	day after day	day	after
2001	FIC	Bk:Mercy	day after day	day	after
2001	FIC	Mov:IamSam	day after day	day	after
2001	FIC	Mov:LifeAsAHouse	day after day	day	after
2001	MAG	Backpacker	day after day	day	after
2001	MAG	Bicycling	day after day	day	after
2001	MAG	TodaysParent	day after day	day	after
2001	MAG	HarpersMag	day after day	day	after
2001	MAG	Fortune	day after day	day	after
2001	MAG	AmerArtist	day after day	day	after
2001	MAG	AmerArtist	day after day	day	after
2001	MAG	AmSpect	day after day	day	after
2001	MAG	GoodHousekeeping	day after day	day	after
2001	MAG	TIME	day after day	day	after
2001	NEWS	NYTimes	day after day	day	after
2001	NEWS	CSMonitor	day after day	day	after
2001	NEWS	CSMonitor	day after day	day	after
2001	NEWS	CSMonitor	day after day	day	after
2001	NEWS	WashPost	day after day	day	after
2001	NEWS	Atlanta	day after day	day	after
2001	NEWS	Denver	day after day	day	after
2001	ACAD	ReVision	day after day	day	after
2001	ACAD	CrossCurrents	day after day	day	after
2000	SPOK	CBS_Morning	day after day	day	after
2000	SPOK	NBC_Dateline	day after day	day	after
2000	SPOK	CNN_Novak	day after day	day	after
2000	SPOK	CNN_Reliable	day after day	day	after
2000	SPOK	CNN_Reliable	day after day	day	after
2000	FIC	SouthernRev	day after day	day	after
2000	FIC	Atlantic	day after day	day	after
2000	FIC	SouthernRev	day after day	day	after
2000	FIC	NewMoon	day after day	day	after
2000	FIC	LitCavalcade	day after day	day	after
2000	FIC	NewEnglandRev	day after day	day	after
2000	FIC	HarpersMag	day after day	day	after
2000	FIC	Analog	day after day	day	after
2000	FIC	CanadianFict	day after day	day	after
2000	FIC	ChicagoRev	day after day	day	after
2000	FIC	ChicagoRev	day after day	day	after
2000	FIC	MassachRev	day after day	day	after
2000	FIC	BkSF:Enchantment	day after day	day	after
2000	FIC	Bk:LocalGirls	day after day	day	after
2000	MAG	NaturalHist	day after day	day	after
2000	MAG	AmSpect	day after day	day	after
2000	MAG	PopMech	day after day	day	after
2000	MAG	TIME	day after day	day	after
2000	NEWS	NYTimes	day after day	day	after
2000	NEWS	NYTimes	day after day	day	after
2000	NEWS	NYTimes	day after day	day	after
2000	NEWS	AssocPress	day after day	day	after
2000	NEWS	USAToday	day after day	day	after
2000	NEWS	SanFranChron	day after day	day	after
2000	NEWS	Houston	day after day	day	after
2000	NEWS	Chicago	day after day	day	after
2000	NEWS	Denver	day after day	day	after
2000	NEWS	Denver	day after day	day	after
2000	ACAD	AmerScholar	day after day	day	after
1999	SPOK	CBS_48Hours	day after day	day	after
1999	SPOK	ABC_20/20	day after day	day	after
1999	SPOK	ABC_GMA	day after day	day	after
1999	SPOK	CNN_Talkback	day after day	day	after
1999	SPOK	CNN_Talkback	day after day	day	after
1999	SPOK	NBC_Dateline	day after day	day	after
1999	SPOK	NBC_Dateline	day after day	day	after
1999	SPOK	Fox_Hume	day after day	day	after
1999	SPOK	Fox_Hume	day after day	day	after
1999	SPOK	Ind_NewsForum	day after day	day	after
1999	SPOK	NPR_ATC	day after day	day	after
1999	SPOK	NPR_Weekend	day after day	day	after
1999	FIC	ChildLife	day after day	day	after
1999	FIC	Analog	day after day	day	after
1999	FIC	Analog	day after day	day	after
1999	FIC	FantasySciFi	day after day	day	after
1999	FIC	Salmagundi	day after day	day	after
1999	FIC	NewEnglandRev	day after day	day	after
1999	FIC	VirginiaQRev	day after day	day	after
1999	FIC	SouthernRev	day after day	day	after
1999	FIC	Bk:Evening	day after day	day	after
1999	FIC	Bk:EveningNews	day after day	day	after
1999	MAG	Backpacker	day after day	day	after
1999	MAG	TodaysParent	day after day	day	after
1999	MAG	ChildLife	day after day	day	after
1999	MAG	Skiing	day after day	day	after
1999	MAG	USCatholic	day after day	day	after
1999	MAG	NatlReview	day after day	day	after
1999	MAG	Prevention	day after day	day	after
1999	NEWS	NYTimes	day after day	day	after
1999	NEWS	CSMonitor	day after day	day	after
1999	NEWS	USAToday	day after day	day	after
1999	NEWS	WashPost	day after day	day	after
1999	NEWS	WashPost	day after day	day	after
1999	NEWS	Atlanta	day after day	day	after
1999	NEWS	SanFranChron	day after day	day	after
1999	NEWS	Houston	day after day	day	after
1999	NEWS	Houston	day after day	day	after
1999	NEWS	Chicago	day after day	day	after
1999	NEWS	Chicago	day after day	day	after
1999	NEWS	Chicago	day after day	day	after
1999	NEWS	Chicago	day after day	day	after
1999	NEWS	Denver	day after day	day	after
1999	NEWS	Denver	day after day	day	after
1999	ACAD	October	day after day	day	after
1999	ACAD	October	day after day	day	after
1999	ACAD	HispanicRev	day after day	day	after
1999	ACAD	EnvironEd	day after day	day	after
1998	MAG	OutdoorLife	day after day	day	after
1998	MAG	Ms	day after day	day	after
1998	MAG	BoysLife	day after day	day	after
1998	MAG	BoysLife	day after day	day	after
1998	MAG	TodaysParent	day after day	day	after
1998	MAG	TodaysParent	day after day	day	after
1998	MAG	Astronomy	day after day	day	after
1998	MAG	AmHeritage	day after day	day	after
1998	MAG	SportingNews	day after day	day	after
1998	MAG	People	day after day	day	after
1998	MAG	VegTimes	day after day	day	after
1998	NEWS	NYTimes	day after day	day	after
1998	NEWS	NYTimes	day after day	day	after
1998	NEWS	CSMonitor	day after day	day	after
1998	NEWS	WashPost	day after day	day	after
1998	NEWS	Denver	day after day	day	after
1998	ACAD	CrossCurrents	day after day	day	after
1998	ACAD	AnthropolQ	day after day	day	after
1998	ACAD	IntlAffairs	day after day	day	after
1998	ACAD	ABAJournal	day after day	day	after
1998	ACAD	ClearingHouse	day after day	day	after
1998	ACAD	MusicEduc	day after day	day	after
1998	SPOK	NPR_Weekend	day after day	day	after
1998	SPOK	ABC_GMA	day after day	day	after
1998	SPOK	CBS_Special	day after day	day	after
1998	SPOK	NBC_Dateline	day after day	day	after
1998	SPOK	Fox_Sunday	day after day	day	after
1998	SPOK	CBS_PublicEye	day after day	day	after
1998	SPOK	CBS_SunMorn	day after day	day	after
1998	SPOK	NPR_Weekly	day after day	day	after
1998	SPOK	NPR_Saturday	day after day	day	after
1998	SPOK	NPR_Saturday	day after day	day	after
1998	FIC	Analog	day after day	day	after
1998	FIC	Analog	day after day	day	after
1998	FIC	Ploughshares	day after day	day	after
1998	FIC	ContempFic	day after day	day	after
1998	FIC	Frontiers	day after day	day	after
1998	FIC	NewEnglandRev	day after day	day	after
1998	FIC	SouthernRev	day after day	day	after
1998	FIC	ContempFic	day after day	day	after
1998	FIC	LiteraryRev	day after day	day	after
1998	FIC	Bk:FlyingLeap	day after day	day	after
1998	FIC	Bk:EatingChinese	day after day	day	after
1998	MAG	GoodHousekeeping	day after day	day	after
1998	MAG	Smithsonian	day after day	day	after
1998	MAG	SatEvenPost	day after day	day	after
1998	MAG	TIME	day after day	day	after
1997	SPOK	CBS_Morning	day after day	day	after
1997	SPOK	CBS_Morning	day after day	day	after
1997	SPOK	CBS_Morning	day after day	day	after
1997	SPOK	CNN_Company	day after day	day	after
1997	SPOK	CNN_Crossfire	day after day	day	after
1997	SPOK	Ind_NewsForum	day after day	day	after
1997	SPOK	CBS_SunMorn	day after day	day	after
1997	SPOK	Ind_Springer	day after day	day	after
1997	SPOK	Ind_Springer	day after day	day	after
1997	SPOK	Ind_Springer	day after day	day	after
1997	FIC	KenyonRev	day after day	day	after
1997	FIC	Writer	day after day	day	after
1997	FIC	GoodHousekeeping	day after day	day	after
1997	FIC	Triquarterly	day after day	day	after
1997	FIC	LiteraryRev	day after day	day	after
1997	FIC	VirginiaQRev	day after day	day	after
1997	FIC	AnthropolToday	day after day	day	after
1997	FIC	Ebony	day after day	day	after
1997	FIC	FantasySciFi	day after day	day	after
1997	FIC	Ploughshares	day after day	day	after
1997	FIC	ArkansasRev	day after day	day	after
1997	FIC	SewaneeRev	day after day	day	after
1997	FIC	ArkansasRev	day after day	day	after
1997	FIC	LiteraryRev	day after day	day	after
1997	FIC	LiteraryRev	day after day	day	after
1997	FIC	Bk:OrdinarySeaman	day after day	day	after
1997	FIC	Bk:PassionDreamBook	day after day	day	after
1997	MAG	FieldStream	day after day	day	after
1997	MAG	NaturalHist	day after day	day	after
1997	MAG	HarpersMag	day after day	day	after
1997	MAG	Essence	day after day	day	after
1997	MAG	AmHeritage	day after day	day	after
1997	MAG	MensHealth	day after day	day	after
1997	MAG	Prevention	day after day	day	after
1997	MAG	Esquire	day after day	day	after
1997	NEWS	WashPost	day after day	day	after
1997	NEWS	Houston	day after day	day	after
1997	NEWS	Houston	day after day	day	after
1997	ACAD	AnthropolQ	day after day	day	after
1997	ACAD	SocialResrch	day after day	day	after
1997	ACAD	SocialResrch	day after day	day	after
1997	ACAD	SouthwestRev	day after day	day	after
1997	SPOK	PBS_Newshour	day after day	day	after
1997	SPOK	NPR_Saturday	day after day	day	after
1996	SPOK	ABC_20/20	day after day	day	after
1996	SPOK	ABC_20/20	day after day	day	after
1996	SPOK	ABC_20/20	day after day	day	after
1996	SPOK	CNN_Reliable	day after day	day	after
1996	SPOK	CNN_Reliable	day after day	day	after
1996	SPOK	CNN_Reliable	day after day	day	after
1996	SPOK	ABC_Primetime	day after day	day	after
1996	SPOK	CNN_Reliable	day after day	day	after
1996	SPOK	CBS_SunMorn	day after day	day	after
1996	SPOK	ABC_Brinkley	day after day	day	after
1996	SPOK	ABC_Turning	day after day	day	after
1996	SPOK	NPR_Weekly	day after day	day	after
1996	SPOK	NPR_Saturday	day after day	day	after
1996	SPOK	NPR_Saturday	day after day	day	after
1996	FIC	Tikkun	day after day	day	after
1996	FIC	ParisRev	day after day	day	after
1996	FIC	LiteraryRev	day after day	day	after
1996	FIC	LiteraryRev	day after day	day	after
1996	FIC	LiteraryRev	day after day	day	after
1996	FIC	SouthernRev	day after day	day	after
1996	FIC	MassachRev	day after day	day	after
1996	FIC	ArkansasRev	day after day	day	after
1996	FIC	AustrJNursing	day after day	day	after
1996	FIC	ChicagoRev	day after day	day	after
1996	FIC	ChicagoRev	day after day	day	after
1996	FIC	FantasySciFi	day after day	day	after
1996	FIC	SouthwestRev	day after day	day	after
1996	FIC	SouthwestRev	day after day	day	after
1996	FIC	Bk:AudreyHepburnsNeck	day after day	day	after
1996	MAG	Bicycling	day after day	day	after
1996	MAG	TotalHealth	day after day	day	after
1996	MAG	AmericanCraft	day after day	day	after
1996	MAG	Skiing	day after day	day	after
1996	MAG	AmerArtist	day after day	day	after
1996	MAG	AmHeritage	day after day	day	after
1996	MAG	AmHeritage	day after day	day	after
1996	MAG	MensHealth	day after day	day	after
1996	MAG	RollingStone	day after day	day	after
1996	NEWS	NYTimes	day after day	day	after
1996	NEWS	NYTimes	day after day	day	after
1996	NEWS	CSMonitor	day after day	day	after
1996	NEWS	WashPost	day after day	day	after
1996	NEWS	WashPost	day after day	day	after
1996	NEWS	Atlanta	day after day	day	after
1996	NEWS	SanFranChron	day after day	day	after
1996	NEWS	SanFranChron	day after day	day	after
1996	NEWS	SanFranChron	day after day	day	after
1996	NEWS	Houston	day after day	day	after
1996	NEWS	Chicago	day after day	day	after
1996	NEWS	Denver	day after day	day	after
1996	NEWS	Denver	day after day	day	after
1996	ACAD	Raritan	day after day	day	after
1996	ACAD	NaturalHist	day after day	day	after
1995	FIC	Omni	day after day	day	after
1995	MAG	OutdoorLife	day after day	day	after
1995	MAG	Ms	day after day	day	after
1995	MAG	Bicycling	day after day	day	after
1995	MAG	MensHealth	day after day	day	after
1995	MAG	MensHealth	day after day	day	after
1995	MAG	MensHealth	day after day	day	after
1995	MAG	Prevention	day after day	day	after
1995	MAG	FieldStream	day after day	day	after
1995	NEWS	CSMonitor	day after day	day	after
1995	NEWS	WashPost	day after day	day	after
1995	NEWS	WashPost	day after day	day	after
1995	NEWS	Houston	day after day	day	after
1995	NEWS	Houston	day after day	day	after
1995	ACAD	WorldAffairs	day after day	day	after
1995	ACAD	Symposium	day after day	day	after
1995	ACAD	Symposium	day after day	day	after
1995	ACAD	AgricResrch	day after day	day	after
1995	SPOK	ABC_20/20	day after day	day	after
1995	SPOK	ABC_20/20	day after day	day	after
1995	SPOK	ABC_WorldNews	day after day	day	after
1995	SPOK	CBS_EyeToEye	day after day	day	after
1995	SPOK	Ind_Geraldo	day after day	day	after
1995	SPOK	CNN_King	day after day	day	after
1995	SPOK	CNN_Reliable	day after day	day	after
1995	SPOK	ABC_Brinkley	day after day	day	after
1995	SPOK	NPR_ATC	day after day	day	after
1995	SPOK	PBS_Newshour	day after day	day	after
1995	SPOK	NPR_Weekend	day after day	day	after
1995	FIC	Atlantic	day after day	day	after
1995	FIC	HarpersMag	day after day	day	after
1995	FIC	Triquarterly	day after day	day	after
1995	FIC	Triquarterly	day after day	day	after
1995	FIC	Triquarterly	day after day	day	after
1995	FIC	LiteraryRev	day after day	day	after
1995	FIC	SouthernRev	day after day	day	after
1995	FIC	Education	day after day	day	after
1995	FIC	FantasySciFi	day after day	day	after
1995	FIC	FantasySciFi	day after day	day	after
1995	FIC	FantasySciFi	day after day	day	after
1995	FIC	BkJuv:Arkadians	day after day	day	after
1995	FIC	BkJuv:Indio	day after day	day	after
1995	FIC	Bk:TrueBetrayals	day after day	day	after
1994	SPOK	ABC_20/20	day after day	day	after
1994	SPOK	ABC_20/20	day after day	day	after
1994	SPOK	ABC_Special	day after day	day	after
1994	SPOK	CBS_Morning	day after day	day	after
1994	FIC	ParisRev	day after day	day	after
1994	FIC	ParisRev	day after day	day	after
1994	FIC	ContempFic	day after day	day	after
1994	FIC	SouthwestRev	day after day	day	after
1994	FIC	BkJuv:FinishingBecca	day after day	day	after
1994	FIC	Bk:NoneAccompany	day after day	day	after
1994	FIC	Bk:Heat	day after day	day	after
1994	FIC	Bk:ProudFree	day after day	day	after
1994	MAG	RollingStone	day after day	day	after
1994	MAG	America	day after day	day	after
1994	MAG	TIME	day after day	day	after
1994	NEWS	WashPost	day after day	day	after
1994	NEWS	WashPost	day after day	day	after
1994	NEWS	WashPost	day after day	day	after
1994	NEWS	SanFranChron	day after day	day	after
1994	NEWS	Houston	day after day	day	after
1994	NEWS	Houston	day after day	day	after
1994	NEWS	Denver	day after day	day	after
1994	ACAD	AmerScholar	day after day	day	after
1994	ACAD	AfricaToday	day after day	day	after
1993	FIC	Omni	day after day	day	after
1993	MAG	SportsIll	day after day	day	after
1993	MAG	Astronomy	day after day	day	after
1993	MAG	NatlReview	day after day	day	after
1993	MAG	Newsweek	day after day	day	after
1993	MAG	OutdoorLife	day after day	day	after
1993	MAG	WashMonth	day after day	day	after
1993	NEWS	CSMonitor	day after day	day	after
1993	NEWS	USAToday	day after day	day	after
1993	NEWS	WashPost	day after day	day	after
1993	NEWS	SanFranChron	day after day	day	after
1993	NEWS	SanFranChron	day after day	day	after
1993	NEWS	SanFranChron	day after day	day	after
1993	NEWS	SanFranChron	day after day	day	after
1993	NEWS	Chicago	day after day	day	after
1993	NEWS	Chicago	day after day	day	after
1993	NEWS	Chicago	day after day	day	after
1993	ACAD	AmerEthnicHis	day after day	day	after
1993	ACAD	Education	day after day	day	after
1993	ACAD	ArtsEduc	day after day	day	after
1993	SPOK	ABC_20/20	day after day	day	after
1993	SPOK	CBS_EyeToEye	day after day	day	after
1993	SPOK	Ind_Geraldo	day after day	day	after
1993	SPOK	CBS_Street	day after day	day	after
1993	SPOK	CNN_Politics	day after day	day	after
1993	SPOK	PBS_Newshour	day after day	day	after
1993	SPOK	PBS_Newshour	day after day	day	after
1993	SPOK	ABC_Nightline	day after day	day	after
1993	FIC	HarpersMag	day after day	day	after
1993	FIC	Iris	day after day	day	after
1993	FIC	NewBegin	day after day	day	after
1993	FIC	NewBegin	day after day	day	after
1993	FIC	CriticalMatrix	day after day	day	after
1993	FIC	WomenLanguage	day after day	day	after
1993	FIC	WomenLanguage	day after day	day	after
1993	FIC	Heritage	day after day	day	after
1993	FIC	KenyonRev	day after day	day	after
1993	FIC	AntiochRev	day after day	day	after
1993	FIC	AntiochRev	day after day	day	after
1993	FIC	BkSF:StrangeDevices	day after day	day	after
1993	FIC	Bk:CerealMurders	day after day	day	after
1993	FIC	Bk:InMyFathers	day after day	day	after
1993	FIC	Bk:BorderMusic	day after day	day	after
1992	SPOK	CBS_48Hours	day after day	day	after
1992	SPOK	CBS_Morning	day after day	day	after
1992	SPOK	CBS_FaceNation	day after day	day	after
1992	SPOK	CBS_FaceNation	day after day	day	after
1992	SPOK	ABC_Special	day after day	day	after
1992	SPOK	CBS_Street	day after day	day	after
1992	SPOK	NPR_ATC	day after day	day	after
1992	SPOK	Fox_Crier	day after day	day	after
1992	FIC	CreativeWoman	day after day	day	after
1992	FIC	VirginiaQRev	day after day	day	after
1992	FIC	LiteraryRev	day after day	day	after
1992	FIC	Ploughshares	day after day	day	after
1992	FIC	Ploughshares	day after day	day	after
1992	FIC	AntiochRev	day after day	day	after
1992	FIC	LiteraryRev	day after day	day	after
1992	FIC	LiteraryRev	day after day	day	after
1992	FIC	LiteraryRev	day after day	day	after
1992	FIC	SewaneeRev	day after day	day	after
1992	FIC	SouthernRev	day after day	day	after
1992	FIC	BkSF:DragonToken	day after day	day	after
1992	FIC	Bk:IAmClay	day after day	day	after
1992	FIC	Bk:IAmClay	day after day	day	after
1992	MAG	FieldStream	day after day	day	after
1992	MAG	FieldStream	day after day	day	after
1992	MAG	Ms	day after day	day	after
1992	MAG	HarpersMag	day after day	day	after
1992	MAG	USAToday	day after day	day	after
1992	MAG	USAToday	day after day	day	after
1992	MAG	PsychToday	day after day	day	after
1992	MAG	Astronomy	day after day	day	after
1992	MAG	AmerArtist	day after day	day	after
1992	MAG	SatEvenPost	day after day	day	after
1992	MAG	Ms	day after day	day	after
1992	MAG	OutdoorLife	day after day	day	after
1992	NEWS	NYTimes	day after day	day	after
1992	NEWS	AssocPress	day after day	day	after
1992	NEWS	USAToday	day after day	day	after
1992	NEWS	WashPost	day after day	day	after
1992	NEWS	Atlanta	day after day	day	after
1992	NEWS	SanFranChron	day after day	day	after
1992	NEWS	Houston	day after day	day	after
1992	ACAD	CrossCurrents	day after day	day	after
1992	ACAD	AnthropolQ	day after day	day	after
1992	ACAD	PerspPolSci	day after day	day	after
1992	ACAD	EnvirAffairs	day after day	day	after
1992	SPOK	CNN_King	day after day	day	after
1992	SPOK	PBS_Newshour	day after day	day	after
1992	SPOK	ABC_Nightline	day after day	day	after
1992	SPOK	ABC_Nightline	day after day	day	after
1991	SPOK	ABC_20/20	day after day	day	after
1991	SPOK	ABC_Primetime	day after day	day	after
1991	SPOK	ABC_Special	day after day	day	after
1991	SPOK	ABC_Brinkley	day after day	day	after
1991	SPOK	CNN_Crossfire	day after day	day	after
1991	SPOK	CNN_King	day after day	day	after
1991	SPOK	CNN_King	day after day	day	after
1991	SPOK	PBS_Newshour	day after day	day	after
1991	SPOK	PBS_Newshour	day after day	day	after
1991	SPOK	ABC_Nightline	day after day	day	after
1991	SPOK	ABC_Nightline	day after day	day	after
1991	SPOK	ABC_Nightline	day after day	day	after
1991	FIC	Atlantic	day after day	day	after
1991	FIC	Atlantic	day after day	day	after
1991	FIC	VirginiaQRev	day after day	day	after
1991	FIC	Iris	day after day	day	after
1991	FIC	KansasQ	day after day	day	after
1991	FIC	SouthernRev	day after day	day	after
1991	FIC	Commentary	day after day	day	after
1991	FIC	BkSF:Outlander	day after day	day	after
1991	FIC	BkSF:Mailman	day after day	day	after
1991	FIC	BkSF:StarfireDown	day after day	day	after
1991	FIC	Bk:Heartbeak	day after day	day	after
1991	FIC	Bk:Heartbeak	day after day	day	after
1991	FIC	Bk:Scarlett	day after day	day	after
1991	FIC	Mov:SilenceLambs	day after day	day	after
1991	MAG	AmHeritage	day after day	day	after
1991	MAG	AmHeritage	day after day	day	after
1991	MAG	Newsweek	day after day	day	after
1991	MAG	Newsweek	day after day	day	after
1991	MAG	Prevention	day after day	day	after
1991	MAG	Prevention	day after day	day	after
1991	MAG	ScienceNews	day after day	day	after
1991	MAG	USNWR	day after day	day	after
1991	MAG	USNWR	day after day	day	after
1991	MAG	WashMonth	day after day	day	after
1991	MAG	Americas	day after day	day	after
1991	MAG	Horticulture	day after day	day	after
1991	NEWS	NYTimes	day after day	day	after
1991	NEWS	CSMonitor	day after day	day	after
1991	NEWS	CSMonitor	day after day	day	after
1991	NEWS	CSMonitor	day after day	day	after
1991	NEWS	CSMonitor	day after day	day	after
1991	NEWS	WashPost	day after day	day	after
1991	NEWS	SanFranChron	day after day	day	after
1991	ACAD	Raritan	day after day	day	after
1991	ACAD	AmerStudies	day after day	day	after
1991	ACAD	AmerIndianQ	day after day	day	after
1991	ACAD	Ethnology	day after day	day	after
1991	ACAD	Ethnology	day after day	day	after
1991	ACAD	SocialResrch	day after day	day	after
1991	ACAD	WorldAffairs	day after day	day	after
1991	ACAD	ClearingHouse	day after day	day	after
1991	ACAD	ArtBulletin	day after day	day	after
1990	NEWS	NYTimes	day after day	day	after
1990	NEWS	CSMonitor	day after day	day	after
1990	NEWS	CSMonitor	day after day	day	after
1990	NEWS	CSMonitor	day after day	day	after
1990	NEWS	USAToday	day after day	day	after
1990	NEWS	WashPost	day after day	day	after
1990	NEWS	SanFranChron	day after day	day	after
1990	ACAD	GeographRev	day after day	day	after
1990	ACAD	AnthropolQ	day after day	day	after
1990	ACAD	SportBehavior	day after day	day	after
1990	ACAD	Education	day after day	day	after
1990	ACAD	RoeperReview	day after day	day	after
1990	ACAD	RoeperReview	day after day	day	after
1990	ACAD	NaturalHist	day after day	day	after
1990	SPOK	ABC_20/20	day after day	day	after
1990	SPOK	CNN_King	day after day	day	after
1990	SPOK	CNN_King	day after day	day	after
1990	SPOK	PBS_Newshour	day after day	day	after
1990	SPOK	PBS_Newshour	day after day	day	after
1990	SPOK	CNN_NewsSun	day after day	day	after
1990	FIC	HarpersMag	day after day	day	after
1990	FIC	VirginiaQRev	day after day	day	after
1990	FIC	Bk:RabbitRest	day after day	day	after
1990	FIC	Bk:RabbitRest	day after day	day	after
1990	FIC	Bk:RabbitRest	day after day	day	after
1990	FIC	Bk:PublicSecrets	day after day	day	after
1990	FIC	Bk:PublicSecrets	day after day	day	after
1990	FIC	Bk:BonfireVanities	day after day	day	after
1990	FIC	Bk:GiftUponShore	day after day	day	after
1990	MAG	MotherEarth	day after day	day	after
1990	MAG	AmSpect	day after day	day	after
1990	MAG	Newsweek	day after day	day	after
1990	MAG	Newsweek	day after day	day	after
1990	MAG	Prevention	day after day	day	after
1990	MAG	Smithsonian	day after day	day	after
1990	MAG	Smithsonian	day after day	day	after
1990	MAG	WashMonth	day after day	day	after
1990	MAG	Americas	day after day	day	after
1990	MAG	NewRepublic	day after day	day	after
1990	MAG	NewRepublic	day after day	day	after
1990	MAG	Weatherwise	day after day	day	after
1990	MAG	TIME	day after day	day	after
1990	NEWS	AssocPress	day after day	day	after
1990	NEWS	USAToday	day after day	day	after
2004	ACAD	ChurchHistory	day after day	day	after
2004	ACAD	FeministStud	day after day	day	after
2004	SPOK	CNN_OnStory	day after day	day	after
2000	SPOK	CNN_Insight	day after day	day	after
2003	SPOK	NPR_Saturday	day after day	day	after
2015	NEWS	Pittsburgh	day after day	day	after
2014	FIC	Ploughshares	day after day	day	after
2014	MAG	NewStatesman	day after day	day	after
2010	SPOK	ABC_ThisWeek	day after day	day	after
2010	MAG	RollingStone	day after day	day	after
2009	NEWS	WashPost	day after day	day	after
2008	SPOK	NBC_Dateline	day after day	day	after
2002	SPOK	NBC_Dateline	day after day	day	after
2001	SPOK	CNN_Reliable	day after day	day	after
1999	MAG	MotherEarth	day after day	day	after
1996	SPOK	NPR_Weekly	day after day	day	after
1994	SPOK	ABC_20/20	day after day	day	after
1994	SPOK	ABC_Primetime	day after day	day	after
1994	FIC	Bk:TrappersMoon	day after day	day	after
1990	FIC	Bk:PeopleIKnow	day after day	day	after
2017	FIC	Analog	day after day	day	after
2014	FIC	FantasySciFi	day after day	day	after
2014	FIC	NewEnglandRev	day after day	day	after
2010	SPOK	CBS_NewsEve	day after day	day	after
2009	FIC	FantasySciFi	day after day	day	after
2006	SPOK	NPR_Science	day after day	day	after
1997	FIC	ContempFic	day after day	day	after
2008	NEWS	Houston	day by day	day	by
2007	MAG	SportingNews	day by day	day	by
2005	SPOK	CNN_Intl	day by day	day	by
2005	NEWS	Denver	day by day	day	by
1999	FIC	Bk:TermLimits	day by day	day	by
1993	NEWS	WashPost	day by day	day	by
1997	FIC	Bk:ColdMountain	day by day	day	by
2011	MAG	WashMonth	day by day	day	by
2007	ACAD	ArtBulletin	day by day	day	by
2001	MAG	MotherEarth	day by day	day	by
2006	SPOK	CNN_Gupta	day by day	day	by
1991	SPOK	PBS_Newshour	day by day	day	by
1992	SPOK	CNN_King	day by day	day	by
2012	SPOK	NPR: Talk Of The Nation	day by day	day	by
2010	SPOK	NBC_Dateline	day by day	day	by
1998	NEWS	USAToday	day by day	day	by
1991	MAG	HistoryToday	day by day	day	by
2002	SPOK	Ind_Oprah	day by day	day	by
2001	FIC	FantasySciFi	day by day	day	by
2016	SPOK	NPR: Fresh Air	day by day	day	by
2002	SPOK	CNN_KingWknd	day by day	day	by
2013	NEWS	OrangeCR	day by day	day	by
2010	SPOK	Fox_Watch	day by day	day	by
2010	FIC	Hyphen	day by day	day	by
2010	FIC	FantasySciFi	day by day	day	by
2009	MAG	People	day by day	day	by
2003	FIC	Analog	day by day	day	by
2001	SPOK	CNN_Daybreak	day by day	day	by
2000	SPOK	CNN_SunMorn	day by day	day	by
1997	SPOK	Ind_Geraldo	day by day	day	by
1996	SPOK	CBS_SunMorn	day by day	day	by
1996	NEWS	NYTimes	day by day	day	by
1995	FIC	FantasySciFi	day by day	day	by
1993	SPOK	CBS_Morning	day by day	day	by
1993	SPOK	PBS_Newshour	day by day	day	by
1991	FIC	Bk:Heartbeak	day by day	day	by
1996	SPOK	NPR_TalkNation	day by day	day	by
2013	SPOK	CBS: Face The Nation	day by day	day	by
2013	FIC	VirginiaQRev	day by day	day	by
2013	MAG	Smithsonian	day by day	day	by
2011	SPOK	NBC_Dateline	day by day	day	by
2010	SPOK	CBS_NewsEve	day by day	day	by
1990	SPOK	PBS_Newshour	day by day	day	by
2011	FIC	AntiochRev	day by day	day	by
1991	FIC	BkSF:Drifter	day by day	day	by
1998	MAG	Forbes	day by day	day	by
2007	NEWS	Houston	day by day	day	by
2006	SPOK	CNN_Grace	day by day	day	by
2008	SPOK	CNN Newsroom	day by day	day	by
2005	FIC	Analog	day by day	day	by
2002	FIC	AntiochRev	day by day	day	by
2005	SPOK	Ind_Oprah	day by day	day	by
2017	SPOK	CNN: Anderson Cooper	day by day	day	by
2004	SPOK	CNN_SunMorn	day by day	day	by
1994	ACAD	Environment	day by day	day	by
1994	SPOK	NPR_Weekend	day by day	day	by
2013	SPOK	CNN: New Day Saturday	day by day	day	by
2017	SPOK	CNN: New Day	day by day	day	by
2017	SPOK	CNN: CNN Newsroom	day by day	day	by
2017	FIC	Analog	day by day	day	by
2016	ACAD	... English Literature, 1500 - 1900	day by day	day	by
2015	FIC	SouthwestRev	day by day	day	by
2015	MAG	PCWorld	day by day	day	by
2014	MAG	America	day by day	day	by
2014	MAG	MilitaryHist	day by day	day	by
2013	ACAD	CollegeStud	day by day	day	by
2012	MAG	MilitaryHist	day by day	day	by
2012	MAG	NewStatesman	day by day	day	by
2011	FIC	Analog	day by day	day	by
2011	FIC	FantasySciFi	day by day	day	by
2011	MAG	Atlantic	day by day	day	by
2010	SPOK	PBS_NewsHour	day by day	day	by
2010	SPOK	PBS_NewsHour	day by day	day	by
2010	SPOK	NBC_MeetPress	day by day	day	by
2010	SPOK	CNN_Brown	day by day	day	by
2010	SPOK	CNN_Velez	day by day	day	by
2010	FIC	Analog	day by day	day	by
2010	FIC	Analog	day by day	day	by
2010	MAG	TownCountry	day by day	day	by
2009	FIC	Analog	day by day	day	by
2009	MAG	TodaysParent	day by day	day	by
2009	NEWS	WashPost	day by day	day	by
2007	MAG	PopMech	day by day	day	by
2006	SPOK	Fox_Sunday	day by day	day	by
2006	FIC	Analog	day by day	day	by
2005	SPOK	CNN_LiveSat	day by day	day	by
2005	SPOK	CNN_Reliable	day by day	day	by
2005	FIC	Bk:Conviction	day by day	day	by
2005	NEWS	AssocPress	day by day	day	by
2005	NEWS	SanFranChron	day by day	day	by
2004	SPOK	NPR_Sunday	day by day	day	by
2003	SPOK	CBS_48Hours	day by day	day	by
2003	MAG	Redbook	day by day	day	by
2002	SPOK	NPR_ATC	day by day	day	by
2002	FIC	ChicagoRev	day by day	day	by
2002	ACAD	Bioscience	day by day	day	by
2001	NEWS	USAToday	day by day	day	by
2001	ACAD	Mercury	day by day	day	by
2000	SPOK	NPR_ATC	day by day	day	by
2000	SPOK	CNN_Politics	day by day	day	by
2000	SPOK	CNN_SunMorn	day by day	day	by
2000	SPOK	CNN_SatMorn	day by day	day	by
2000	MAG	SkyTelescope	day by day	day	by
1999	SPOK	ABC_Special	day by day	day	by
1999	MAG	USCatholic	day by day	day	by
1998	SPOK	CNN_Talkback	day by day	day	by
1998	MAG	TIME	day by day	day	by
1998	NEWS	Denver	day by day	day	by
1997	SPOK	CNN_Talkback	day by day	day	by
1997	FIC	SatEvenPost	day by day	day	by
1997	FIC	SouthwestRev	day by day	day	by
1995	SPOK	ABC_WorldNews	day by day	day	by
1995	SPOK	CBS_SunMorn	day by day	day	by
1995	SPOK	PBS_Newshour	day by day	day	by
1995	MAG	Money	day by day	day	by
1995	MAG	Prevention	day by day	day	by
1994	SPOK	CBS_EyeToEye	day by day	day	by
1994	SPOK	PBS_Newshour	day by day	day	by
1994	SPOK	ABC_Nightline	day by day	day	by
1994	FIC	Mov:BattleShaker	day by day	day	by
1994	NEWS	Chicago	day by day	day	by
1993	FIC	Bk:BorderMusic	day by day	day	by
1993	ACAD	PSAJournal	day by day	day	by
1992	FIC	Bk:InMyFathers	day by day	day	by
1992	ACAD	EnergyJournal	day by day	day	by
1991	SPOK	CNN_Crossfire	day by day	day	by
1991	FIC	BkSF:DragonReborn	day by day	day	by
1991	MAG	Money	day by day	day	by
1991	MAG	Omni	day by day	day	by
1991	NEWS	CSMonitor	day by day	day	by
1991	ACAD	Style	day by day	day	by
1991	ACAD	Mercury	day by day	day	by
1990	SPOK	PBS_Newshour	day by day	day	by
1990	MAG	Forbes	day by day	day	by
1990	NEWS	CSMonitor	day by day	day	by
1990	ACAD	NaturalHist	day by day	day	by
2015	SPOK	CNN: CNN Newsroom	day by day	day	by
2006	MAG	WashMonth	day by day	day	by
1996	FIC	ParisRev	day by day	day	by
1995	MAG	Smithsonian	day by day	day	by
1994	ACAD	CrossCurrents	day by day	day	by
2015	SPOK	NPR: Fresh Air	day by day	day	by
2015	SPOK	NPR: Fresh Air	day by day	day	by
1990	NEWS	WashPost	day by day	day	by
1998	NEWS	Denver	day by day	day	by
2010	NEWS	Chicago	day by day	day	by
2008	MAG	TechReview	day by day	day	by
1995	MAG	NaturalHist	day by day	day	by
2003	FIC	Bk:BackRoads	day by day	day	by
1992	ACAD	Ethnology	day by day	day	by
2016	MAG	Gizmodo	day by day	day	by
2014	NEWS	Denver	day by day	day	by
2010	SPOK	NPR_Science	day by day	day	by
1997	MAG	RollingStone	day by day	day	by
1992	MAG	Smithsonian	day by day	day	by
2005	MAG	ArtAmerica	day by day	day	by
2011	FIC	NewStatesman	day by day	day	by
2011	ACAD	AmerScholar	day by day	day	by
2003	ACAD	CommCollegeR	day by day	day	by
2000	ACAD	AfricanArts	day by day	day	by
2000	ACAD	ArtsEduc	day by day	day	by
1999	FIC	VirginiaQRev	day by day	day	by
1995	NEWS	Denver	day by day	day	by
1994	MAG	MensHealth	day by day	day	by
1994	ACAD	Style	day by day	day	by
1992	MAG	Smithsonian	day by day	day	by
1992	NEWS	Atlanta	day by day	day	by
1991	MAG	AmSpect	day by day	day	by
1990	NEWS	WashPost	day by day	day	by
1990	ACAD	EnvirAffairs	day by day	day	by
1991	SPOK	CNN_Crossfire	day by day	day	by
2012	SPOK	PBS_NewsHour	day by day	day	by
1998	ACAD	October	day by day	day	by
2012	SPOK	PBS: PBS Newshour	day by day	day	by
2017	ACAD	The Independent Review	day by day	day	by
2000	MAG	TechReview	day by day	day	by
2015	NEWS	NYTimes	day by day	day	by
2013	FIC	VirginiaQRev	day by day	day	by
2010	NEWS	AssocPress	day by day	day	by
2009	SPOK	PBS_NewsHour	day by day	day	by
2008	FIC	Analog	day by day	day	by
2008	NEWS	NYTimes	day by day	day	by
2005	SPOK	PBS_Tavis	day by day	day	by
2002	SPOK	CBS_SixtyII	day by day	day	by
2002	FIC	Bk:Summons	day by day	day	by
2002	ACAD	ArabStudies	day by day	day	by
2000	SPOK	CNN_Event	day by day	day	by
2000	NEWS	NYTimes	day by day	day	by
1998	SPOK	PBS_Newshour	day by day	day	by
1995	SPOK	ABC_Nightline	day by day	day	by
1993	NEWS	WashPost	day by day	day	by
1991	SPOK	CNN_King	day by day	day	by
2000	MAG	MotherJones	day by day	day	by
2017	SPOK	NPR: Fresh Air	day by day	day	by
2010	ACAD	Commentary	day by day	day	by
2011	FIC	Bk:CentralParkKnight	day by day	day	by
2014	SPOK	ABC: This Week	day by day	day	by
1999	SPOK	NPR_TalkNation	day by day	day	by
2013	SPOK	NPR: Fresh Air	day by day	day	by
1991	SPOK	ABC_Nightline	day by day	day	by
2012	SPOK	PBS: PBS Newshour	day by day	day	by
2005	FIC	IowaRev	day by day	day	by
2016	NEWS	Chicago Tribune	day by day	day	by
2014	SPOK	NPR: Tell Me More	day by day	day	by
2011	ACAD	AmerScholar	day by day	day	by
1993	NEWS	NYTimes	day by day	day	by
1992	MAG	Ebony	day by day	day	by
1994	SPOK	CBS_Morning	day by day	day	by
2004	FIC	Bk:DoneForDime	day by day	day	by
1990	NEWS	WashPost	day by day	day	by
1994	SPOK	PBS_Newshour	day by day	day	by
2015	SPOK	CBS: Face The Nation	day by day	day	by
2015	FIC	NewEnglandRev	day by day	day	by
2015	MAG	NatlReview	day by day	day	by
2015	NEWS	NYTimes	day by day	day	by
2015	ACAD	WorldAffairs	day by day	day	by
2014	MAG	Newsweek	day by day	day	by
2013	MAG	NewRepublic	day by day	day	by
2012	ACAD	Futurist	day by day	day	by
2011	SPOK	CNN_Morgan	day by day	day	by
2011	ACAD	AmerScholar	day by day	day	by
2010	SPOK	NPR_FreshAir	day by day	day	by
2010	MAG	GoodHousekeeping	day by day	day	by
2010	MAG	TechReview	day by day	day	by
2010	ACAD	Poetry	day by day	day	by
2009	ACAD	ForeignAffairs	day by day	day	by
2009	ACAD	Writer	day by day	day	by
2008	NEWS	Atlanta	day by day	day	by
2007	ACAD	MusicEduc	day by day	day	by
2006	SPOK	CNN_King	day by day	day	by
2006	SPOK	NPR_ATCW	day by day	day	by
2006	FIC	Analog	day by day	day	by
2006	FIC	Analog	day by day	day	by
2006	ACAD	IndepSchool	day by day	day	by
2005	SPOK	Fox_Gibson	day by day	day	by
2005	MAG	VegTimes	day by day	day	by
2004	MAG	HarpersMag	day by day	day	by
2004	NEWS	SanFranChron	day by day	day	by
2003	NEWS	Chicago	day by day	day	by
2003	ACAD	LawPublicPol	day by day	day	by
2002	MAG	CountryLiving	day by day	day	by
2001	FIC	VirginiaQRev	day by day	day	by
2001	MAG	USAToday	day by day	day	by
1999	SPOK	CBS_SunMorn	day by day	day	by
1998	FIC	AntiochRev	day by day	day	by
1998	FIC	LiteraryRev	day by day	day	by
1997	MAG	USAToday	day by day	day	by
1994	SPOK	CBS_SunMorn	day by day	day	by
1994	SPOK	CBS_SunMorn	day by day	day	by
1994	SPOK	CBS_SunMorn	day by day	day	by
1994	MAG	Futurist	day by day	day	by
1994	MAG	Smithsonian	day by day	day	by
1993	FIC	KansasQ	day by day	day	by
1992	ACAD	IntlAffairs	day by day	day	by
1990	NEWS	WashPost	day by day	day	by
1990	NEWS	WashPost	day by day	day	by
1990	ACAD	Raritan	day by day	day	by
1998	FIC	HarpersMag	day by day	day	by
1992	ACAD	CrossCurrents	day by day	day	by
2017	SPOK	CBS: Face The Nation	day by day	day	by
2013	FIC	VirginiaQRev	day by day	day	by
2010	SPOK	CNN_Brown	day by day	day	by
2007	MAG	TotalHealth	day by day	day	by
2006	NEWS	AssocPress	day by day	day	by
2005	FIC	Callaloo	day by day	day	by
2005	FIC	Daedalus	day by day	day	by
2001	SPOK	CBS_SixtyII	day by day	day	by
2000	SPOK	CNN_Talkback	day by day	day	by
1998	NEWS	Chicago	day by day	day	by
1997	MAG	SportingNews	day by day	day	by
1996	FIC	Bk:DarkRoom	day by day	day	by
1995	FIC	LiteraryRev	day by day	day	by
1995	FIC	Bk:Moo	day by day	day	by
1994	FIC	ContempFic	day by day	day	by
1994	FIC	CrossCurrents	day by day	day	by
1994	MAG	Ms	day by day	day	by
1993	SPOK	Ind_Geraldo	day by day	day	by
1990	SPOK	PBS_Newshour	day by day	day	by
1994	FIC	FantasySciFi	day by day	day	by
2002	NEWS	AssocPress	day by day	day	by
2007	SPOK	CNN_Showbiz	day by day	day	by
1997	SPOK	Ind_Springer	day by day	day	by
1994	FIC	FantasySciFi	day by day	day	by
2012	SPOK	ABC: This Week	day by day	day	by
2016	SPOK	PBS: PBS Newshour	day by day	day	by
2016	SPOK	NPR: Fresh Air	day by day	day	by
2016	FIC	Bk:PromiseGrace	day by day	day	by
2015	FIC	MassachRev	day by day	day	by
2013	NEWS	OrangeCR	day by day	day	by
2013	SPOK	CBS: Face The Nation	day by day	day	by
2013	SPOK	PBS: PBS Newshour	day by day	day	by
2010	SPOK	Fox_Watch	day by day	day	by
2010	SPOK	NBC_Dateline	day by day	day	by
2009	ACAD	EnvironHealth	day by day	day	by
2007	ACAD	TeachLibrar	day by day	day	by
2007	ACAD	SouthwestRev	day by day	day	by
2004	NEWS	Atlanta	day by day	day	by
2003	SPOK	CNN_KingWknd	day by day	day	by
2003	FIC	SouthwestRev	day by day	day	by
2001	SPOK	CNN_Daybreak	day by day	day	by
2001	MAG	HarpersMag	day by day	day	by
2001	MAG	NatlReview	day by day	day	by
2000	SPOK	CNN_SunMorn	day by day	day	by
2000	MAG	GoodHousekeeping	day by day	day	by
1999	MAG	Essence	day by day	day	by
1996	SPOK	CBS_SunMorn	day by day	day	by
1996	FIC	SouthernRev	day by day	day	by
1995	SPOK	ABC_Special	day by day	day	by
1995	FIC	FantasySciFi	day by day	day	by
1995	ACAD	SocialStudies	day by day	day	by
1993	SPOK	CBS_Morning	day by day	day	by
1993	SPOK	PBS_Newshour	day by day	day	by
1993	FIC	Bk:Hope	day by day	day	by
1991	SPOK	CNN_King	day by day	day	by
1991	FIC	Bk:ColdFire	day by day	day	by
1991	MAG	HistoryToday	day by day	day	by
1990	SPOK	ABC_SatNews	day by day	day	by
1990	FIC	BkSF:Earth	day by day	day	by
1990	NEWS	CSMonitor	day by day	day	by
1990	NEWS	WashPost	day by day	day	by
2009	MAG	People	day by day	day	by
1992	SPOK	CNN_King	day by day	day	by
2014	NEWS	STLouis	day by day	day	by
2011	SPOK	NPR_TellMore	day by day	day	by
2010	SPOK	CNN_Misc	day by day	day	by
2002	SPOK	CNN_KingWknd	day by day	day	by
2002	SPOK	CNN_Event	day by day	day	by
2017	SPOK	ABC: 20/20	day by day	day	by
2017	FIC	Bk:HardCandySaga	day by day	day	by
2017	MAG	The Atlantic	day by day	day	by
2016	MAG	ESPN	day by day	day	by
2014	FIC	SouthwestRev	day by day	day	by
2013	NEWS	USAToday	day by day	day	by
2012	FIC	Bk:VariationsNovel	day by day	day	by
2011	SPOK	NBC_Dateline	day by day	day	by
2011	SPOK	Fox_Baier	day by day	day	by
2010	FIC	Bk:IdentityMan	day by day	day	by
2009	SPOK	ABC_Nightline	day by day	day	by
2009	FIC	Bk:MomsWord	day by day	day	by
2008	SPOK	NBC_MeetPress	day by day	day	by
2008	SPOK	CBS_Sixty	day by day	day	by
2008	MAG	AmSpect	day by day	day	by
2008	ACAD	AmerScholar	day by day	day	by
2006	SPOK	CNN_AM	day by day	day	by
2006	SPOK	Ind_Oprah	day by day	day	by
2006	SPOK	MSNBC_Matt	day by day	day	by
2006	FIC	NewYorker	day by day	day	by
2006	MAG	TownCountry	day by day	day	by
2006	MAG	TotalHealth	day by day	day	by
2005	SPOK	CNN_Reliable	day by day	day	by
2005	FIC	Bk:LastDays	day by day	day	by
2005	NEWS	USAToday	day by day	day	by
2003	SPOK	CNN_KingWknd	day by day	day	by
2002	NEWS	NYTimes	day by day	day	by
2002	NEWS	AssocPress	day by day	day	by
2001	SPOK	CNN_Politics	day by day	day	by
2000	MAG	BoysLife	day by day	day	by
1999	SPOK	NBC_Dateline	day by day	day	by
1999	FIC	MassachRev	day by day	day	by
1999	ACAD	PerspPolSci	day by day	day	by
1998	FIC	Bk:StartingOut	day by day	day	by
1998	ACAD	ForeignAffairs	day by day	day	by
1998	ACAD	MusicEduc	day by day	day	by
1996	FIC	Bk:HerOwnRules	day by day	day	by
1992	SPOK	CBS_Special	day by day	day	by
1990	FIC	Bk:GiftUponShore	day by day	day	by
2004	ACAD	AmerScholar	day by day	day	by
1999	SPOK	CBS_Sixty	day by day	day	by
1998	MAG	Forbes	day by day	day	by
1996	SPOK	CNN_Showbiz	day by day	day	by
1996	SPOK	NPR_TalkNation	day by day	day	by
2007	SPOK	CBS_48Hours	day by day	day	by
2005	FIC	MichiganQRev	day by day	day	by
2001	SPOK	NPR_ATC	day by day	day	by
1992	NEWS	NYTimes	day by day	day	by
2015	MAG	MotherJones	day by day	day	by
2014	NEWS	OrangeCR	day by day	day	by
2013	SPOK	PBS: PBS Newshour	day by day	day	by
2010	SPOK	CNN_Misc	day by day	day	by
2009	NEWS	WashPost	day by day	day	by
2009	NEWS	WashPost	day by day	day	by
2009	ACAD	Writer	day by day	day	by
2008	MAG	SportingNews	day by day	day	by
2004	NEWS	Houston	day by day	day	by
2003	SPOK	NBC_Today	day by day	day	by
2003	FIC	Bk:RunawayQuilt	day by day	day	by
2003	ACAD	Humanist	day by day	day	by
2002	SPOK	Ind_Oprah	day by day	day	by
2002	SPOK	CNN_King	day by day	day	by
2001	SPOK	ABC_GMA	day by day	day	by
2001	SPOK	CNN_Reliable	day by day	day	by
1998	NEWS	Atlanta	day by day	day	by
1996	MAG	Jet	day by day	day	by
1996	NEWS	NYTimes	day by day	day	by
1992	SPOK	CBS_Sixty	day by day	day	by
1992	SPOK	NPR_ATC	day by day	day	by
1992	NEWS	NYTimes	day by day	day	by
2017	SPOK	NPR: How I Built This	day by day	day	by
2017	SPOK	ABC: 20/20	day by day	day	by
2017	SPOK	ABC: 20/20	day by day	day	by
2017	FIC	Bk:DinosaurKnights	day by day	day	by
2017	FIC	Bk:TheyDancedOn	day by day	day	by
2017	FIC	Analog	day by day	day	by
2017	FIC	Analog	day by day	day	by
2017	FIC	Alive	day by day	day	by
2017	FIC	FantasySciFi	day by day	day	by
2017	MAG	Huffington Post	day by day	day	by
2017	NEWS	cleveland.com	day by day	day	by
2017	NEWS	Chicago Sun-Times	day by day	day	by
2017	NEWS	The Boston Globe	day by day	day	by
2017	NEWS	Chicago Sun-Times	day by day	day	by
2016	SPOK	PBS: PBS Newshour	day by day	day	by
2016	SPOK	CNN: Situation Room	day by day	day	by
2016	SPOK	CNN: Axe Files	day by day	day	by
2016	SPOK	NBC: Today Show	day by day	day	by
2016	SPOK	CNN: Anderson Cooper	day by day	day	by
2016	SPOK	ABC: The View	day by day	day	by
2016	FIC	Analog	day by day	day	by
2016	FIC	...ue : A Journal of Mormon Thought	day by day	day	by
2016	FIC	Obsidian	day by day	day	by
2016	MAG	ESPN	day by day	day	by
2016	MAG	Gizmodo	day by day	day	by
2016	NEWS	Chicago Sun-Times	day by day	day	by
2016	NEWS	Arizona Daily Star	day by day	day	by
2016	NEWS	Columbus Dispatch	day by day	day	by
2016	FIC	Literary Review	day by day	day	by
2015	SPOK	PBS: PBS Newshour	day by day	day	by
2015	FIC	ModernAge	day by day	day	by
2015	FIC	FantasySciFi	day by day	day	by
2015	FIC	MassachRev	day by day	day	by
2015	FIC	FantasySciFi	day by day	day	by
2015	FIC	FilmHistory	day by day	day	by
2015	FIC	FantasySciFi	day by day	day	by
2015	FIC	Raritan	day by day	day	by
2015	FIC	VirginiaQRev	day by day	day	by
2015	FIC	IowaRev	day by day	day	by
2015	FIC	NewEnglandRev	day by day	day	by
2015	MAG	Atlantic	day by day	day	by
2015	MAG	NatlReview	day by day	day	by
2015	MAG	People	day by day	day	by
2015	MAG	People	day by day	day	by
2015	MAG	People	day by day	day	by
2015	MAG	People	day by day	day	by
2015	MAG	SatEvenPost	day by day	day	by
2015	NEWS	WashPost	day by day	day	by
2015	NEWS	USAToday	day by day	day	by
2015	NEWS	STLouis	day by day	day	by
2015	ACAD	JAnimalPlantSci	day by day	day	by
2015	ACAD	EatingDisordersReview	day by day	day	by
2014	SPOK	NBC: Dateline NBC	day by day	day	by
2014	SPOK	NPR: Here And Now	day by day	day	by
2014	SPOK	NPR: Here And Now	day by day	day	by
2014	SPOK	NPR: Here And Now	day by day	day	by
2014	FIC	Bk:FarAsEyeCanSee	day by day	day	by
2014	FIC	Bk:ShadowedByGrace	day by day	day	by
2014	FIC	SewaneeRev	day by day	day	by
2014	MAG	America	day by day	day	by
2014	MAG	Astronomy	day by day	day	by
2014	MAG	Atlantic	day by day	day	by
2014	MAG	MilitaryHist	day by day	day	by
2014	MAG	SatEvenPost	day by day	day	by
2014	NEWS	Atlanta	day by day	day	by
2014	NEWS	USAToday	day by day	day	by
2014	NEWS	CSMonitor	day by day	day	by
2014	NEWS	Austin	day by day	day	by
2014	NEWS	OrangeCR	day by day	day	by
2014	ACAD	ArtJournal	day by day	day	by
2013	MAG	America	day by day	day	by
2013	MAG	GoodHousekeeping	day by day	day	by
2013	MAG	HistoryToday	day by day	day	by
2013	MAG	NatGeog	day by day	day	by
2013	MAG	NaturalHist	day by day	day	by
2013	ACAD	CanadianLiterature	day by day	day	by
2013	ACAD	CanadianLiterature	day by day	day	by
2013	SPOK	NBC: Today Show	day by day	day	by
2013	SPOK	CBS: Face The Nation	day by day	day	by
2013	SPOK	CNN: Nancy Grace	day by day	day	by
2013	SPOK	Fox: On The Record: Susteren	day by day	day	by
2013	SPOK	PBS: PBS Newshour	day by day	day	by
2013	FIC	ParisRev	day by day	day	by
2013	MAG	NewStatesman	day by day	day	by
2012	SPOK	ABC_ThisWeek	day by day	day	by
2012	SPOK	CNN_Grace	day by day	day	by
2012	SPOK	ABC_ThisWeek	day by day	day	by
2012	FIC	NewEnglandRev	day by day	day	by
2012	FIC	FantasySciFi	day by day	day	by
2012	FIC	Bk:2312	day by day	day	by
2012	MAG	AmSpect	day by day	day	by
2012	MAG	MotherEarth	day by day	day	by
2012	NEWS	NYTimes	day by day	day	by
2012	NEWS	Houston	day by day	day	by
2012	NEWS	Houston	day by day	day	by
2012	NEWS	USAToday	day by day	day	by
2012	NEWS	CSMonitor	day by day	day	by
2012	NEWS	Atlanta	day by day	day	by
2012	NEWS	USAToday	day by day	day	by
2012	NEWS	USAToday	day by day	day	by
2011	SPOK	CNN_News	day by day	day	by
2011	SPOK	ABC_GMA	day by day	day	by
2011	FIC	Bk:DeathMaiden	day by day	day	by
2011	FIC	Callaloo	day by day	day	by
2011	FIC	AntiochRev	day by day	day	by
2011	FIC	AntiochRev	day by day	day	by
2011	MAG	USCatholic	day by day	day	by
2011	MAG	Newsweek	day by day	day	by
2011	MAG	Smithsonian	day by day	day	by
2011	MAG	FieldStream	day by day	day	by
2011	NEWS	Atlanta	day by day	day	by
2011	ACAD	Education	day by day	day	by
2010	SPOK	CNN_Velez	day by day	day	by
2010	SPOK	PBS_NewsHour	day by day	day	by
2010	SPOK	ABC_20/20	day by day	day	by
2010	SPOK	NBC_Today	day by day	day	by
2010	SPOK	CNN_Misc	day by day	day	by
2010	FIC	Hyphen	day by day	day	by
2010	FIC	Analog	day by day	day	by
2010	FIC	Analog	day by day	day	by
2010	FIC	Analog	day by day	day	by
2010	FIC	Analog	day by day	day	by
2010	FIC	FantasySciFi	day by day	day	by
2010	FIC	Bk:LoveOnDime	day by day	day	by
2010	FIC	Bk:GhostMoon	day by day	day	by
2010	MAG	ChristCentury	day by day	day	by
2010	MAG	Redbook	day by day	day	by
2010	MAG	Atlantic	day by day	day	by
2010	MAG	Atlantic	day by day	day	by
2010	MAG	AmSpect	day by day	day	by
2010	MAG	ChristCentury	day by day	day	by
2010	MAG	ChristCentury	day by day	day	by
2010	NEWS	NYTimes	day by day	day	by
2010	NEWS	NYTimes	day by day	day	by
2010	NEWS	CSMonitor	day by day	day	by
2010	NEWS	AssocPress	day by day	day	by
2010	NEWS	AssocPress	day by day	day	by
2010	ACAD	PalliativeMedicine	day by day	day	by
2010	ACAD	AmJHeathStud	day by day	day	by
2009	ACAD	TheologStud	day by day	day	by
2009	ACAD	EnvironHealth	day by day	day	by
2009	SPOK	ABC_Nightline	day by day	day	by
2009	SPOK	Fox_Baier	day by day	day	by
2009	SPOK	NPR_TalkNation	day by day	day	by
2009	SPOK	CBS_Early	day by day	day	by
2009	SPOK	Fox_Hannity	day by day	day	by
2009	FIC	Analog	day by day	day	by
2009	MAG	MotherJones	day by day	day	by
2008	SPOK	ABC_20/20	day by day	day	by
2008	SPOK	ABC_20/20	day by day	day	by
2008	SPOK	Fox_Gibson	day by day	day	by
2008	SPOK	PBS_Newshour	day by day	day	by
2008	FIC	Bk:SnowQueen	day by day	day	by
2008	FIC	Analog	day by day	day	by
2008	FIC	Bk:HowBeSingle	day by day	day	by
2008	FIC	Bk:NoOneHeardHerScream	day by day	day	by
2008	FIC	Bk:Fanon	day by day	day	by
2008	FIC	Bk:BloodColony	day by day	day	by
2008	FIC	SouthwestRev	day by day	day	by
2008	MAG	People	day by day	day	by
2008	MAG	SatEvenPost	day by day	day	by
2008	MAG	Newsweek	day by day	day	by
2008	NEWS	CSMonitor	day by day	day	by
2008	NEWS	AssocPress	day by day	day	by
2008	NEWS	CSMonitor	day by day	day	by
2008	ACAD	AmerIndianQ	day by day	day	by
[truncated: 12,999 more rows]
